# Supplementary material for: Synthesis and Characterization of Novel Thieno‐Fused Bicyclic Compounds through New Enaminone Containing Thieno[2,3‐ b ]pyridine Scaffold
Source: Hindawi journal article supplement (doi:10.1155/2015/382381), 2015-01-01
Supplement: f1 [file 382381.f1.pdf]

## Supporting Information

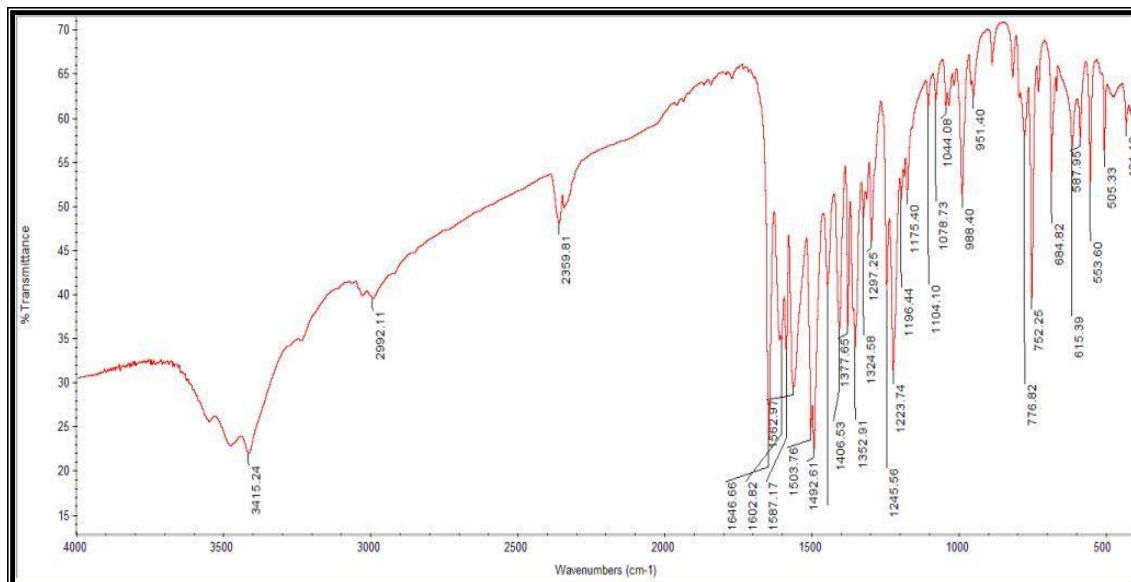

IR spectrum of the compound 2

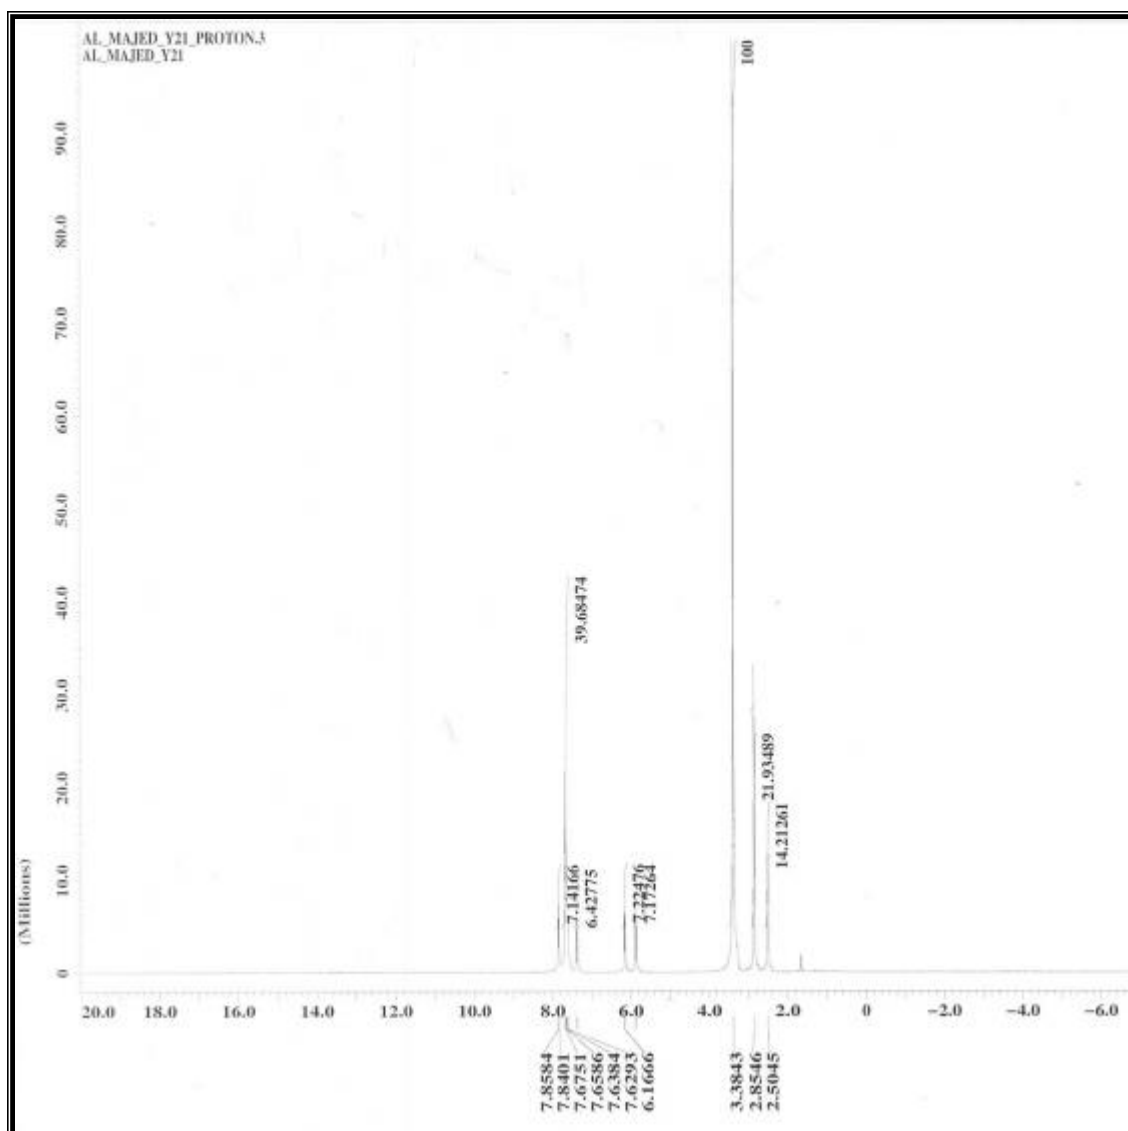

$^1\text{H}$ NMR spectrum of the compound **2**

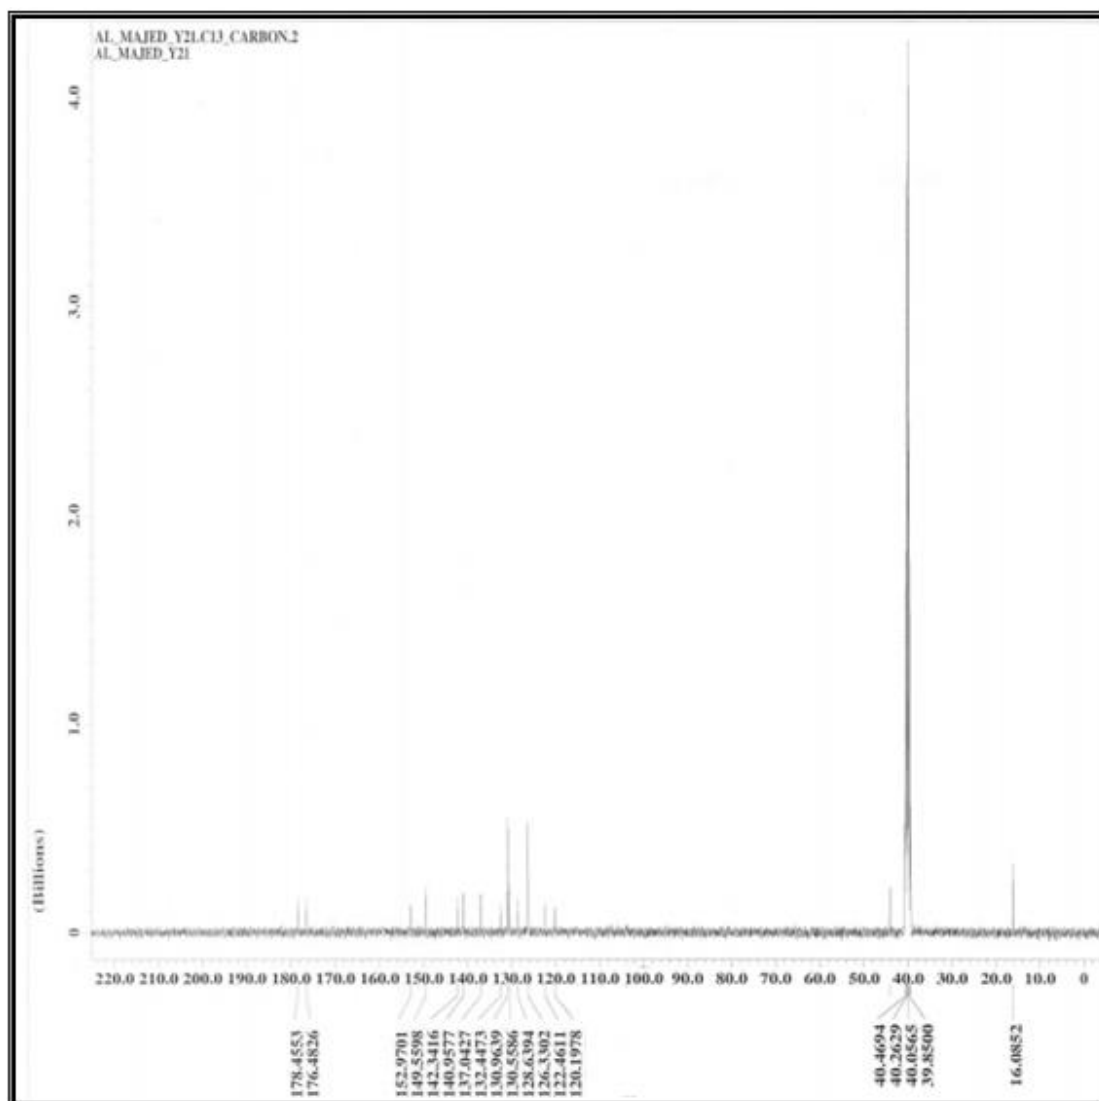

$^{13}\text{C}$ NMR spectrum of the compound **2**

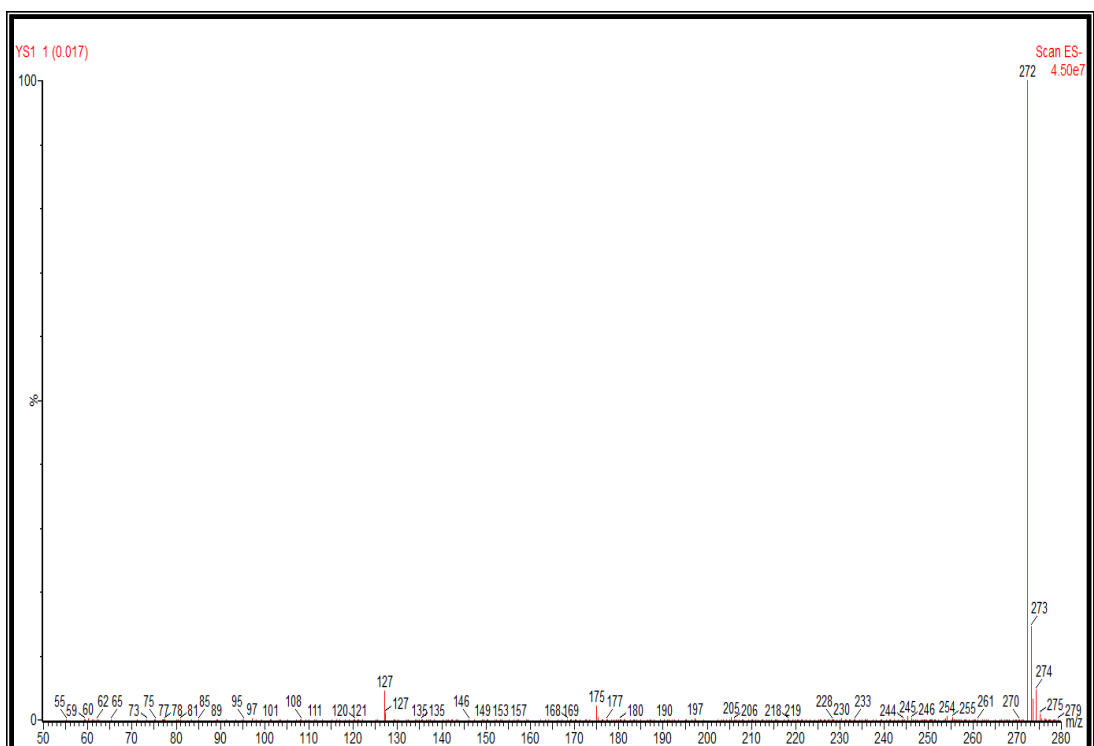

MS spectrum of the compound **2**

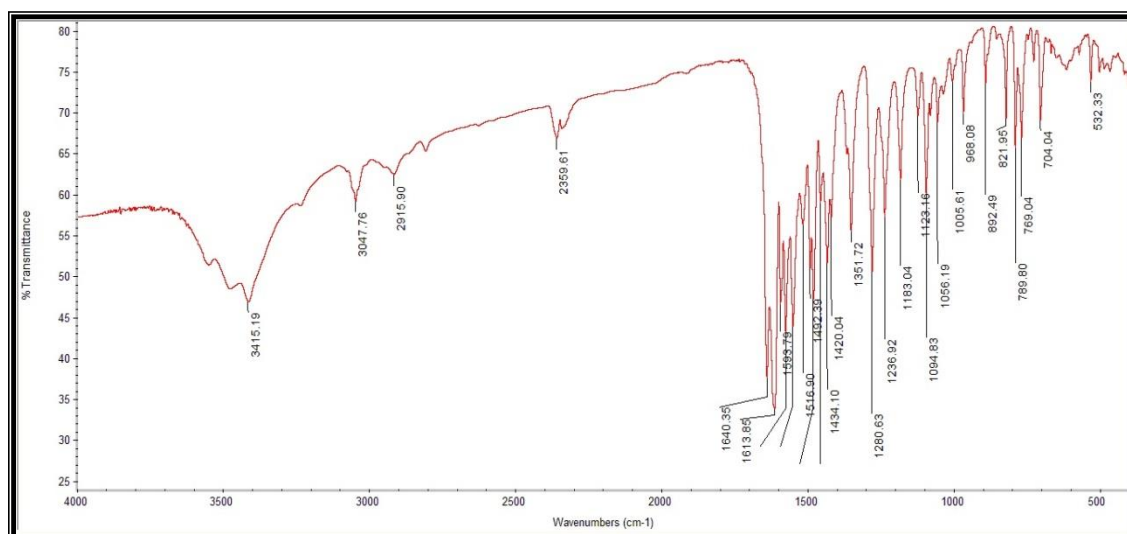

IR spectrum of the compound **3**

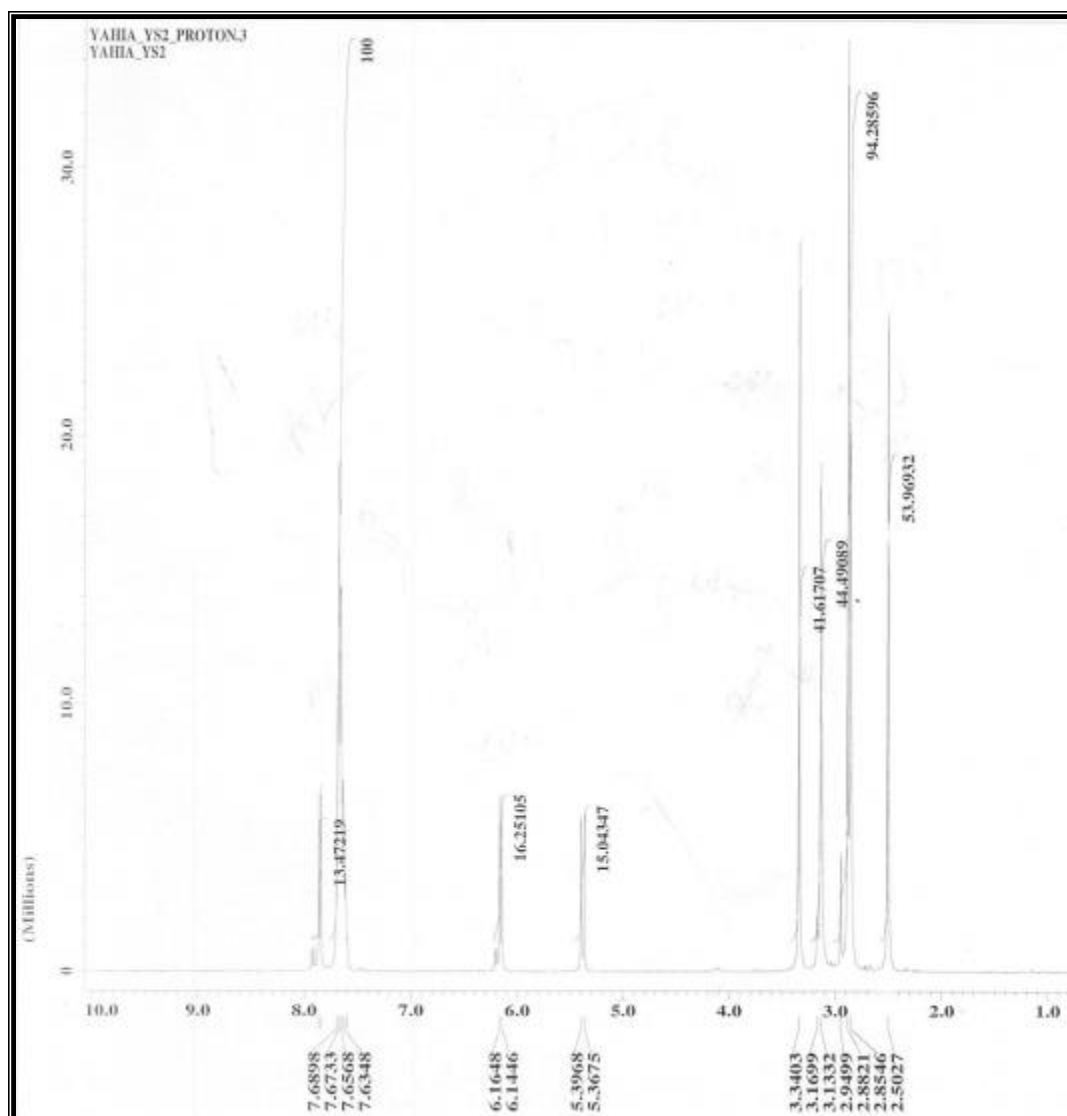

<sup>1</sup>H NMR spectrum of the compound **3**

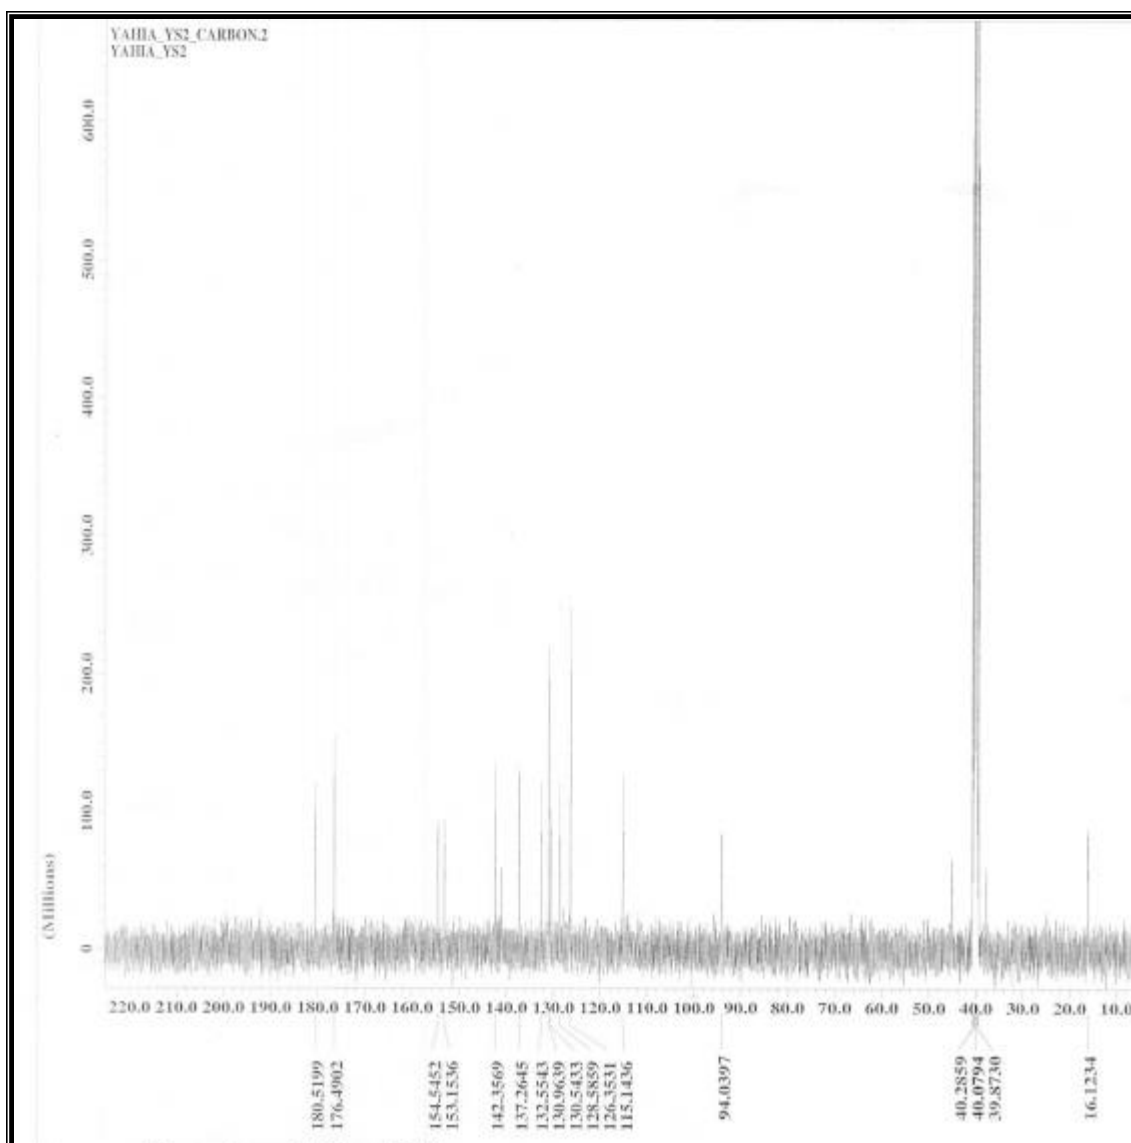

<sup>13</sup>CNMR spectrum of the compound **3**

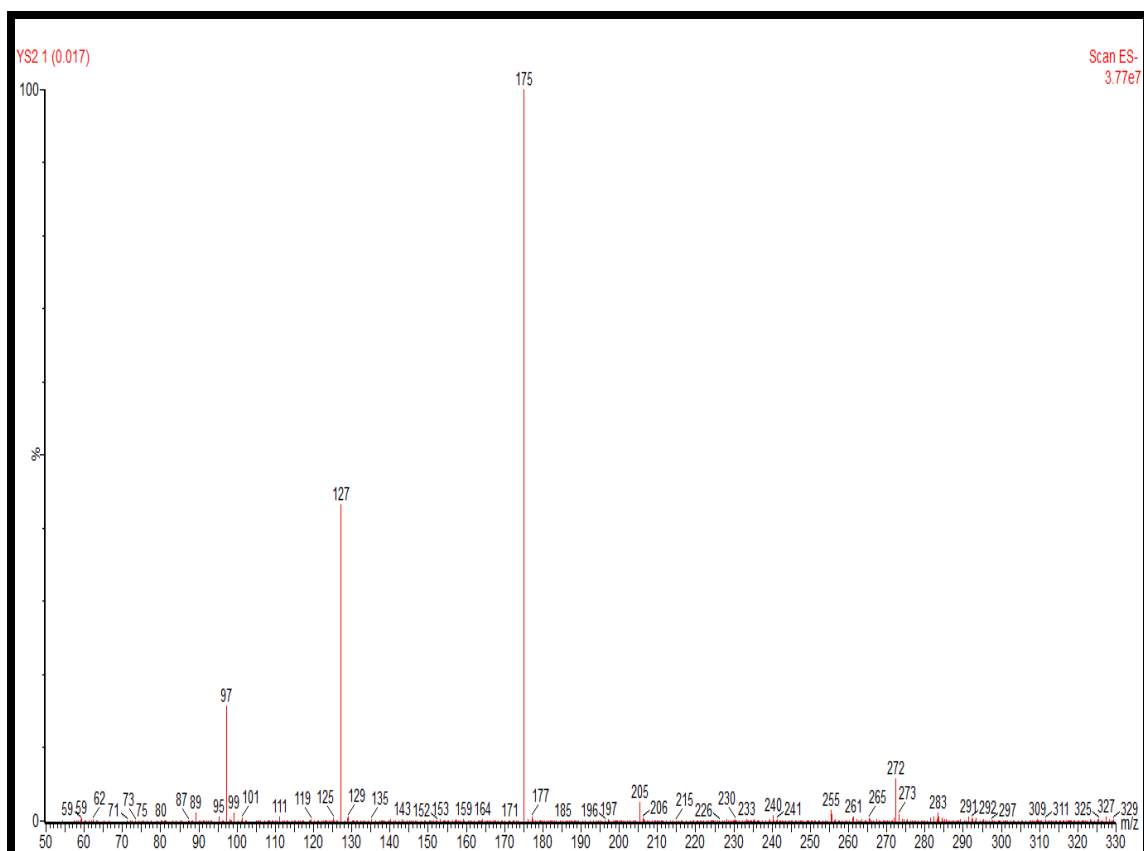

MS spectrum of the compound **3**

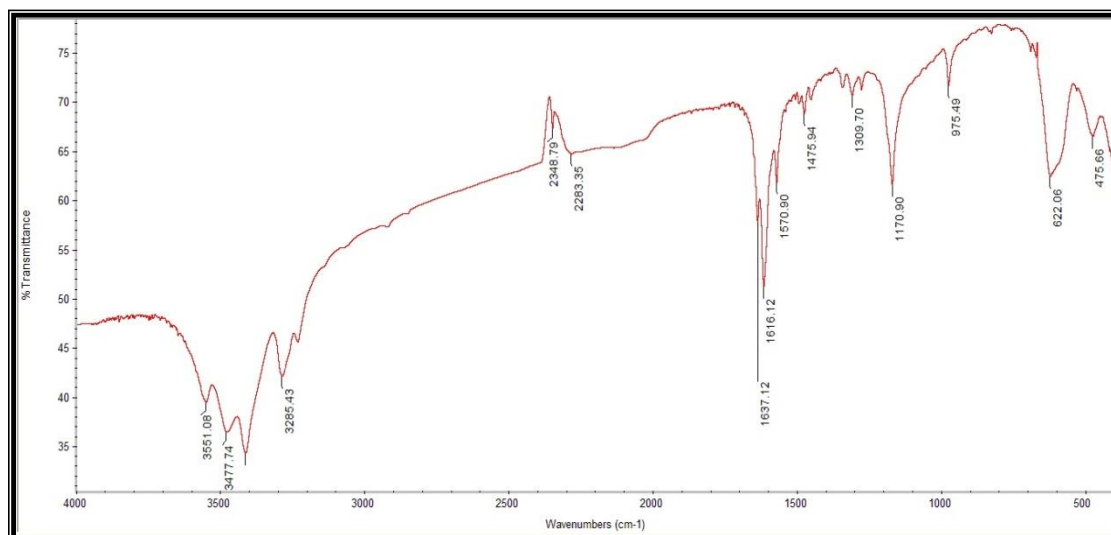

IR spectrum of the compound **4a**

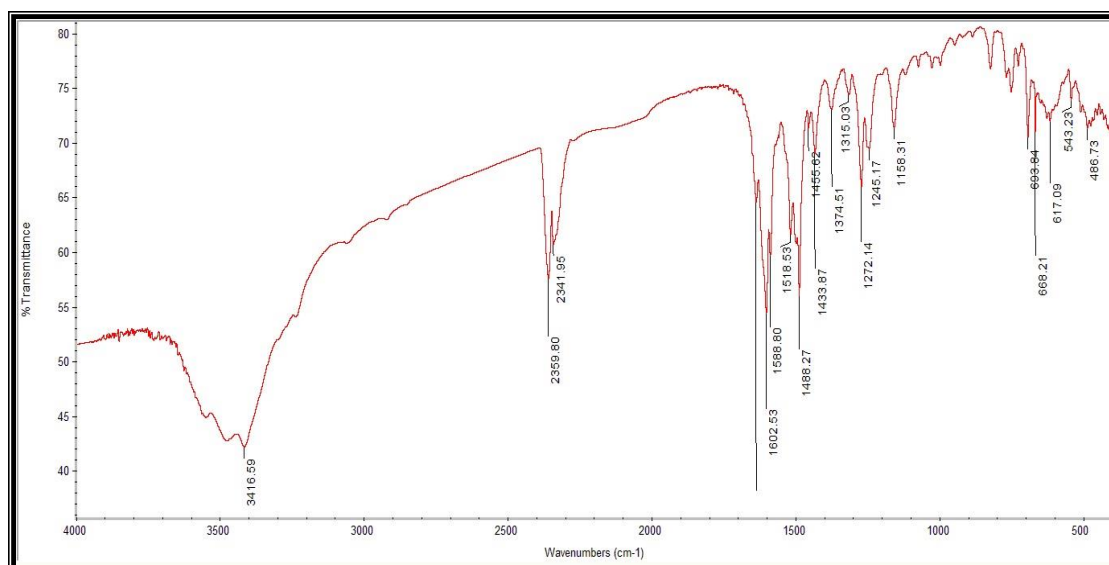

IR spectrum of the compound **4b**



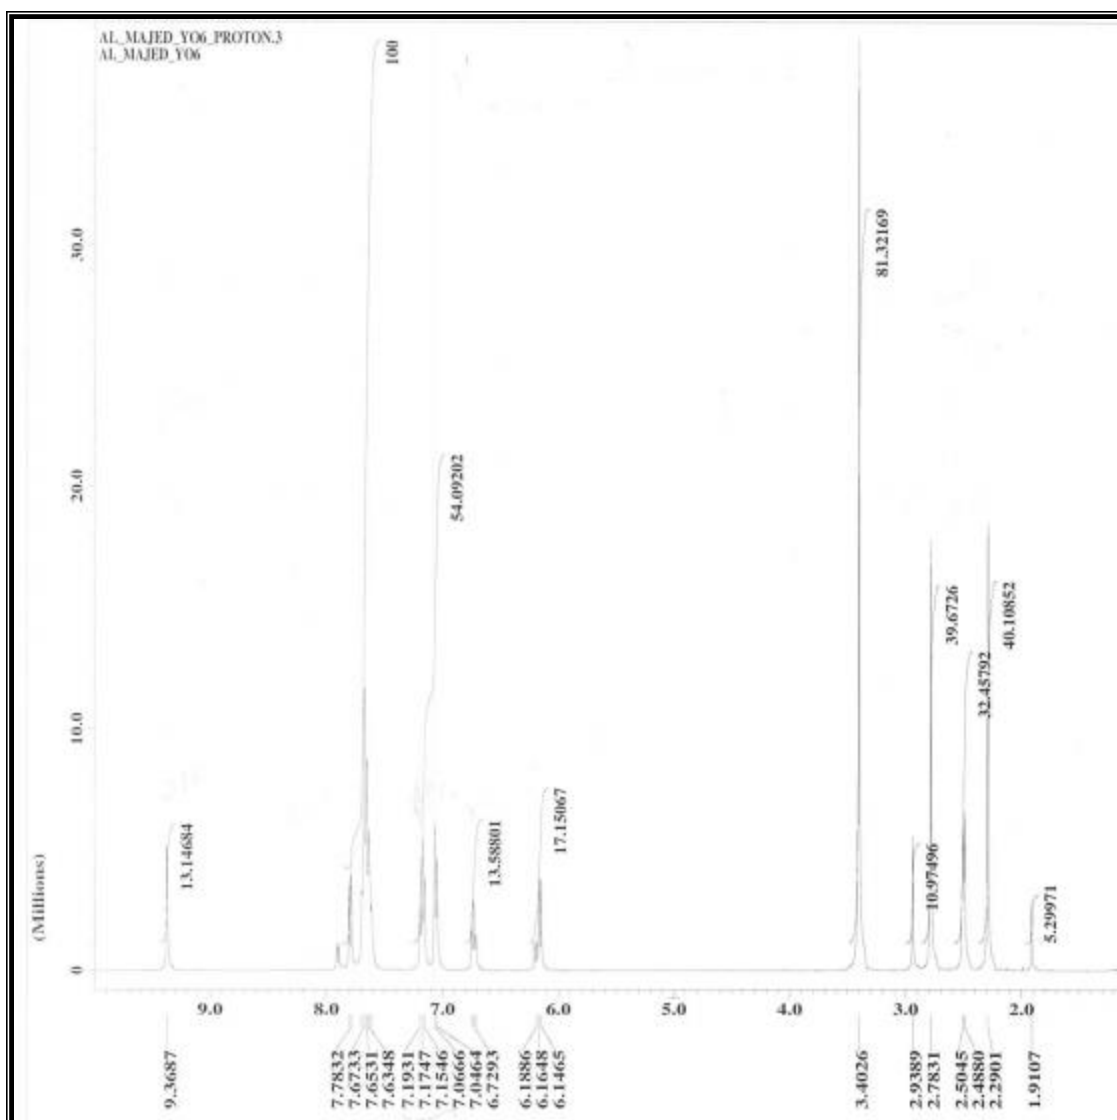

$^1\text{H}$ NMR spectrum of the compound **4b**

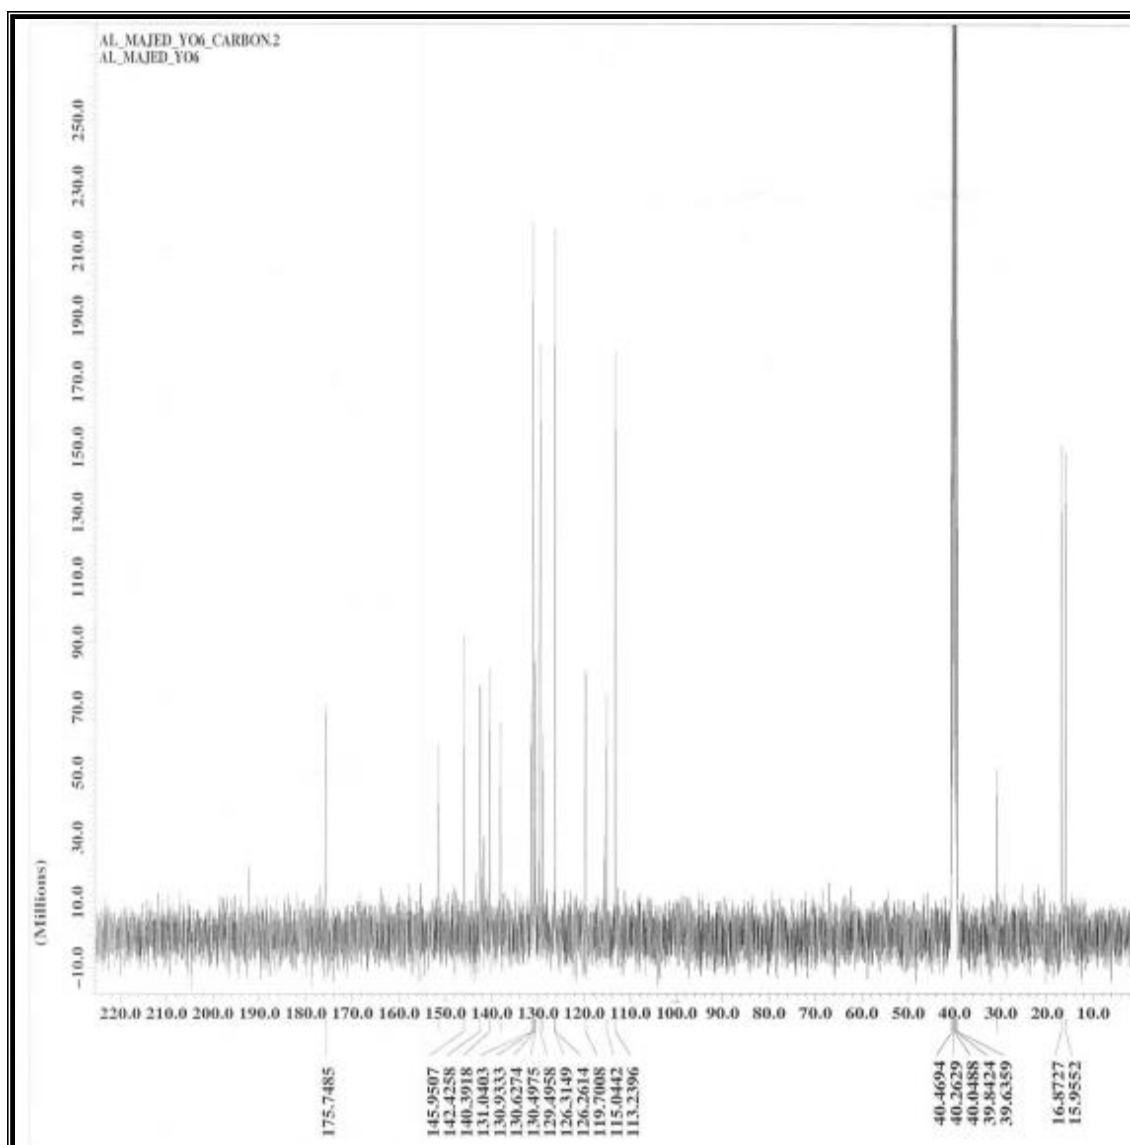

$^{13}\text{C}$ NMR spectrum of the compound **4b**

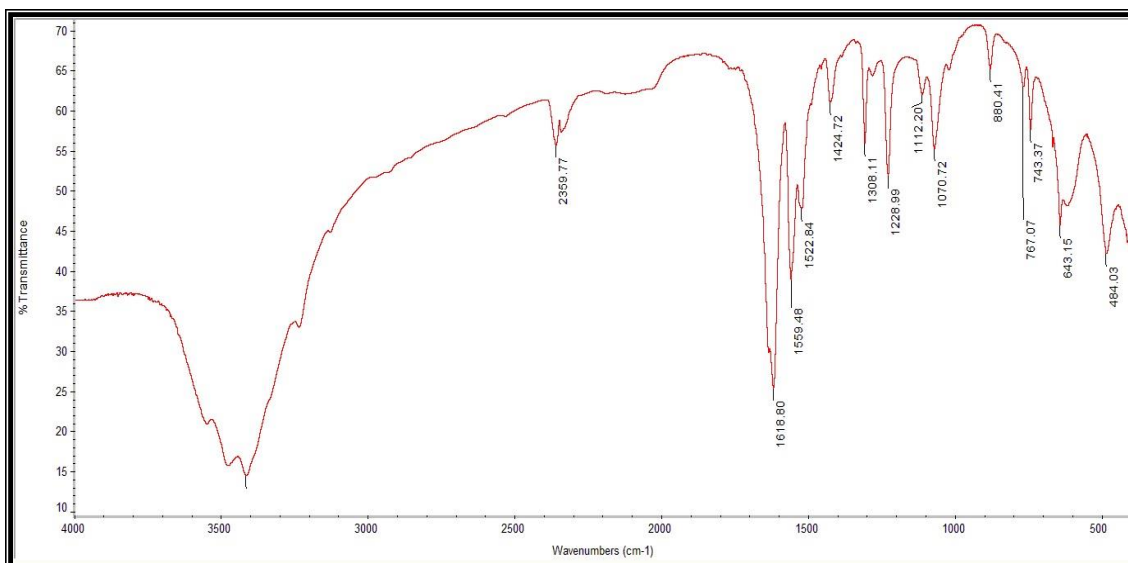

IR spectrum of the compound **5**

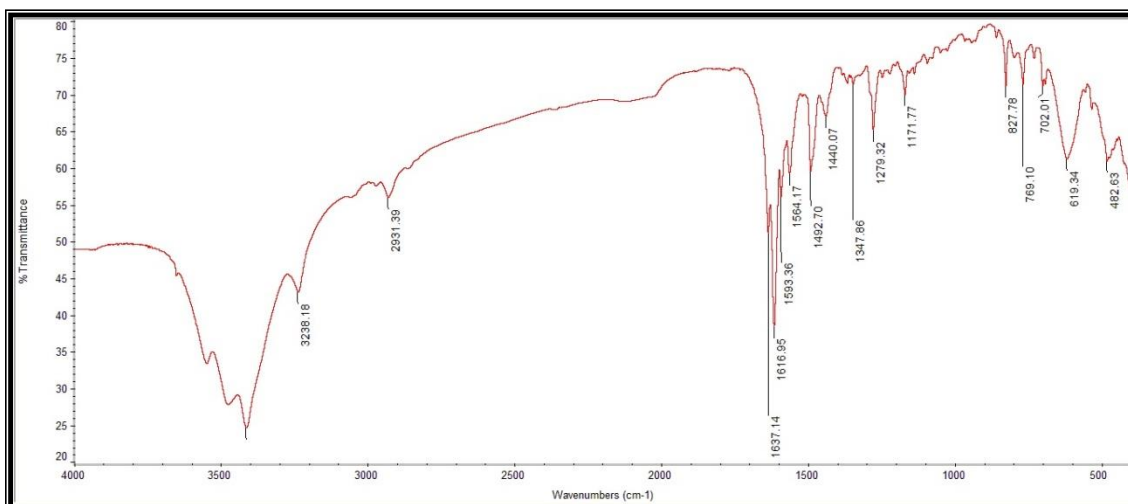

IR spectrum of the compound **6a**

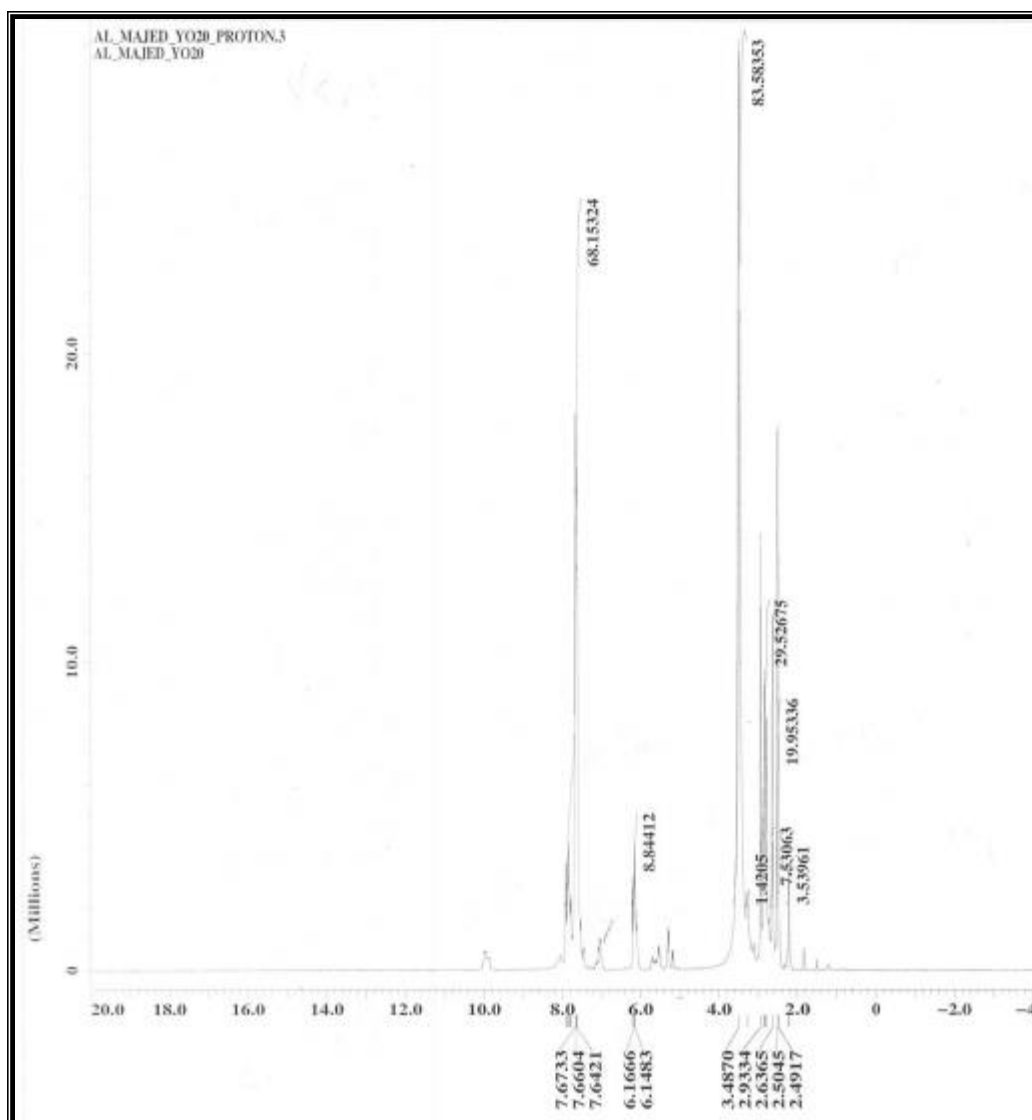

<sup>1</sup>H NMR spectrum of the compound **6a**

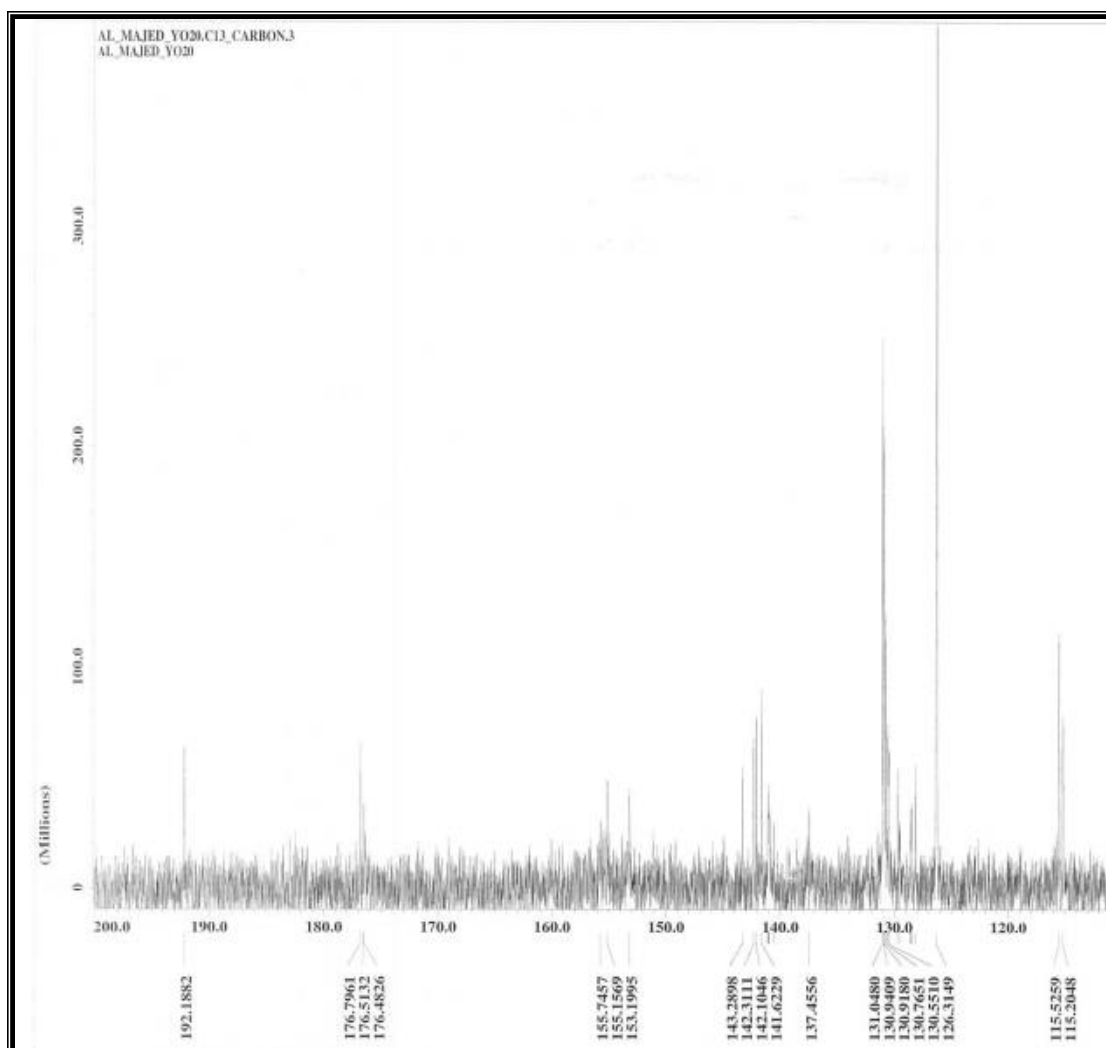

$^{13}\text{C}$ NMR spectrum of the compound **6a**

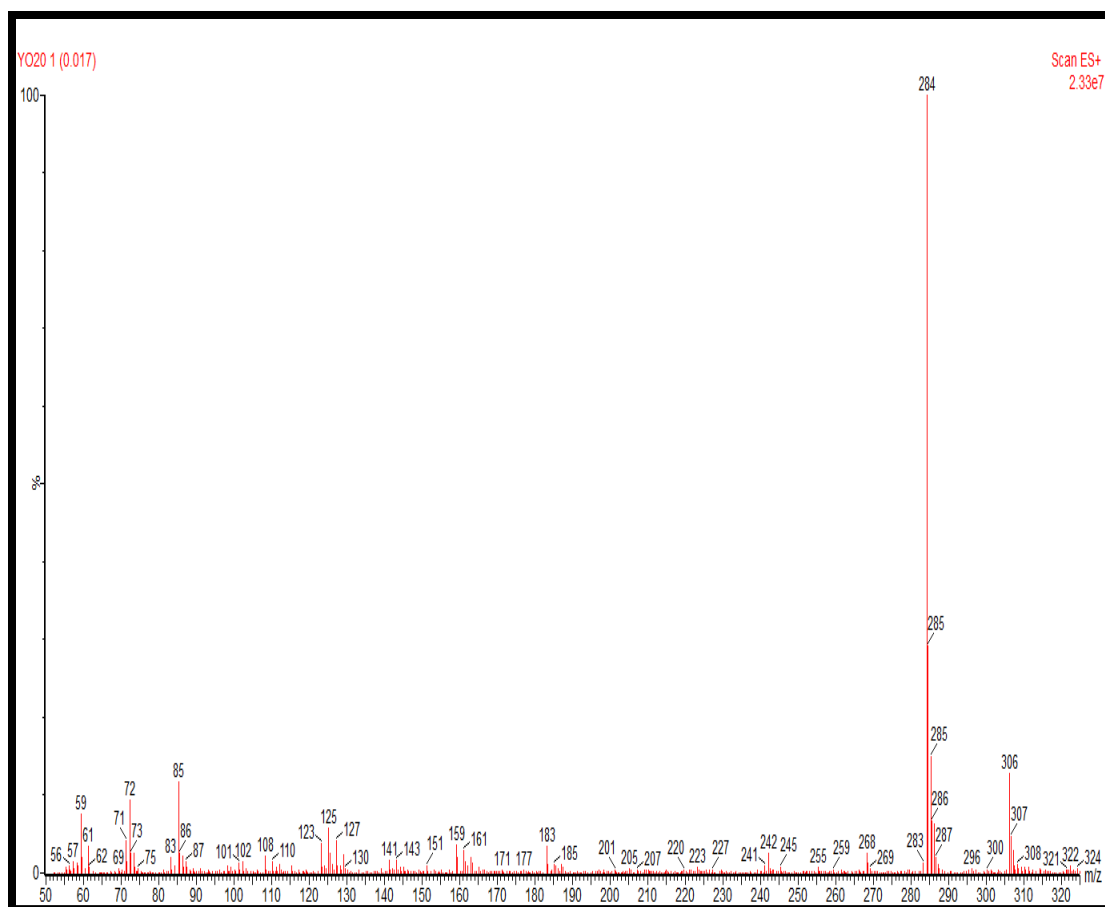

MS spectrum of the compound **6a**

6b

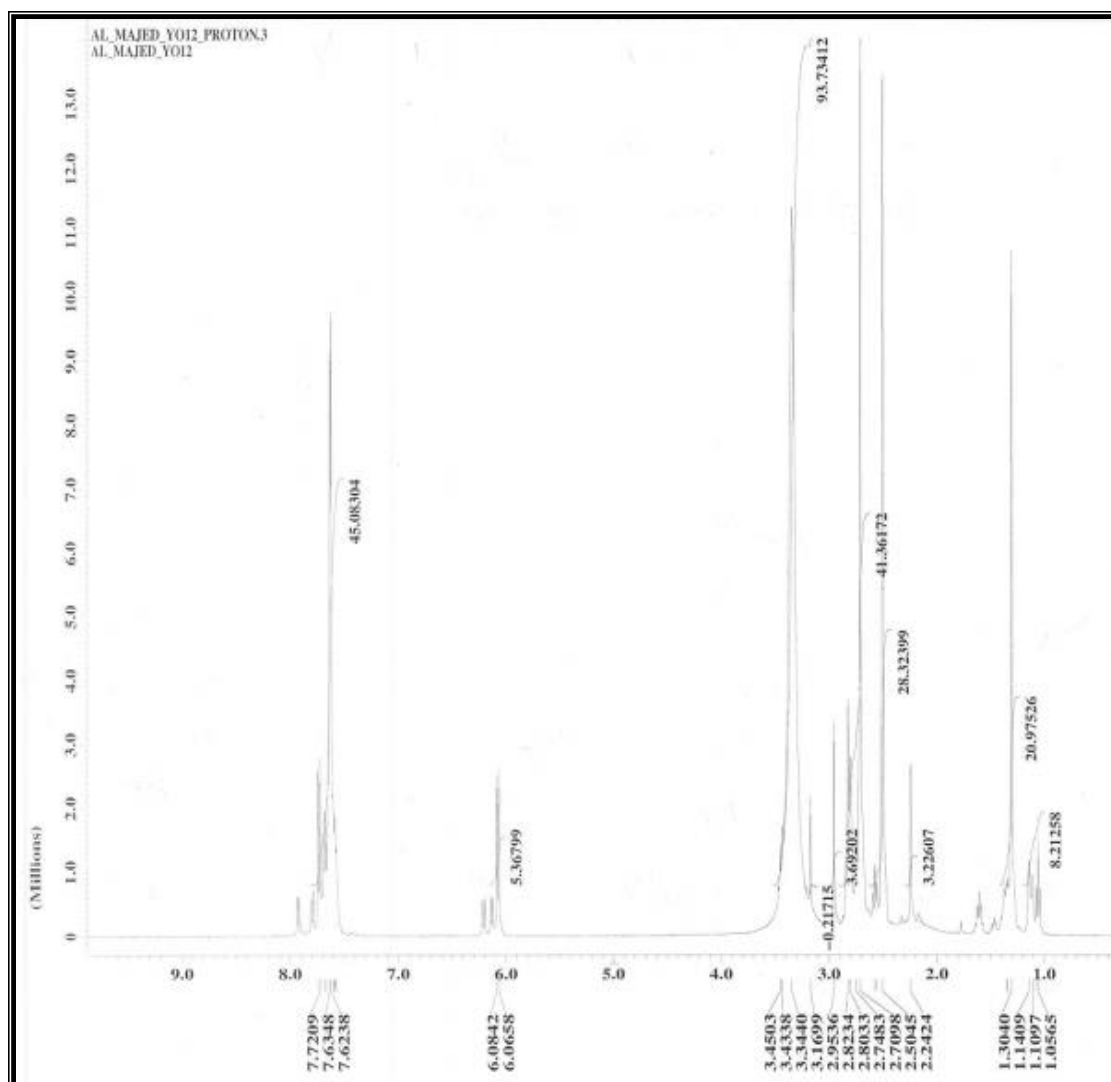

$^1\text{H}$ NMR spectrum of the compound **6b**

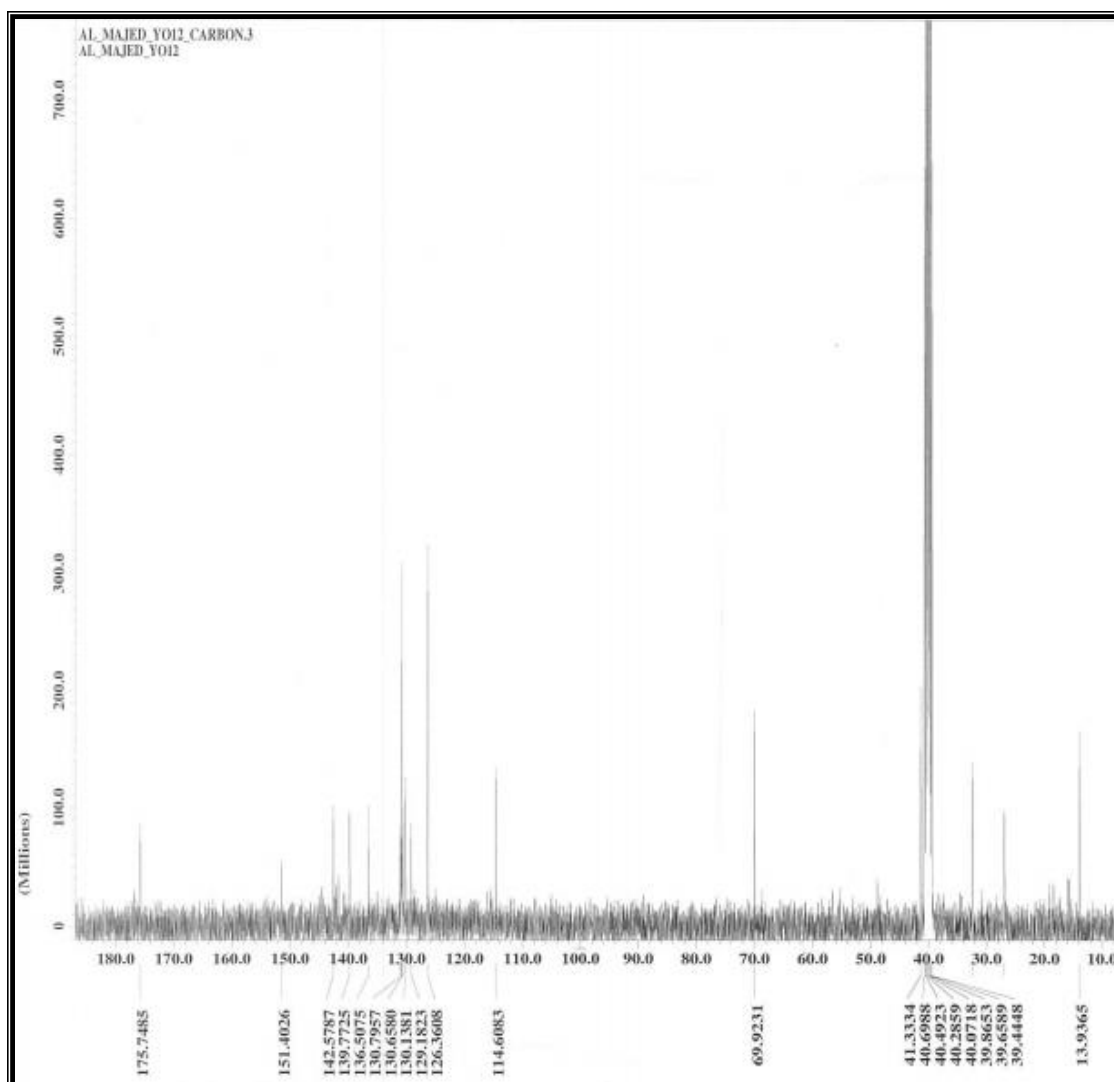

$^{13}\text{C}$ NMR spectrum of the compound **6b**



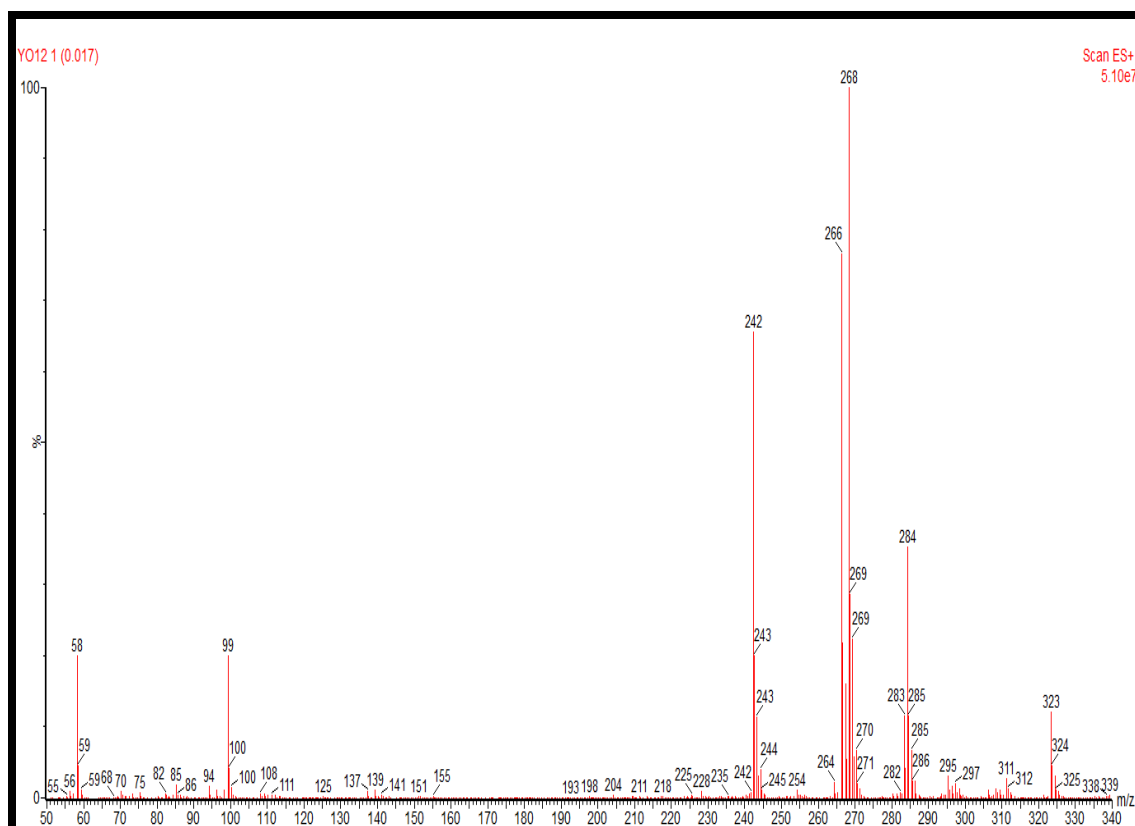

MS spectrum of the compound **6b**

6c

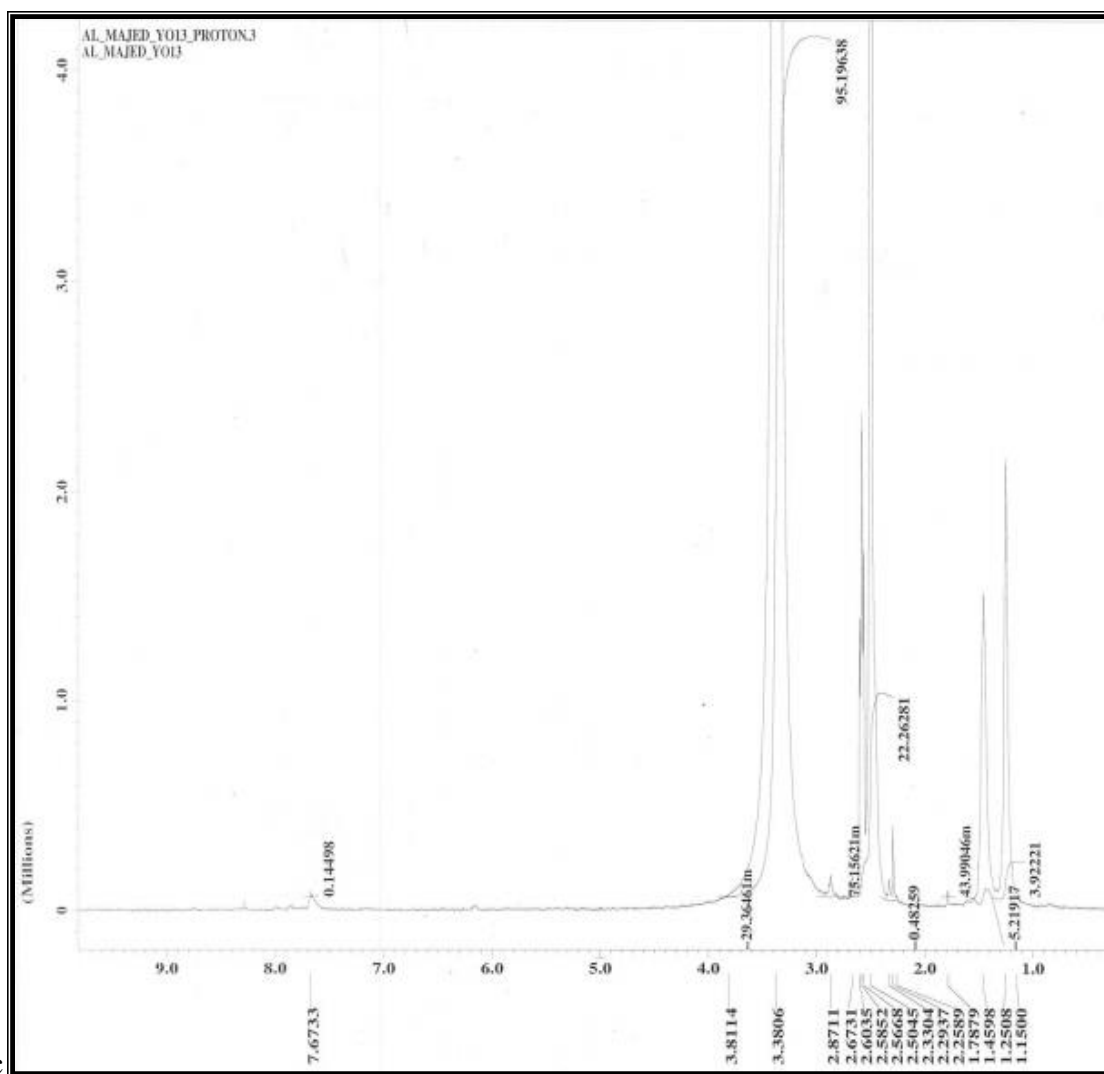

$^1\text{H}$ NMR spectrum of the compound **6c**

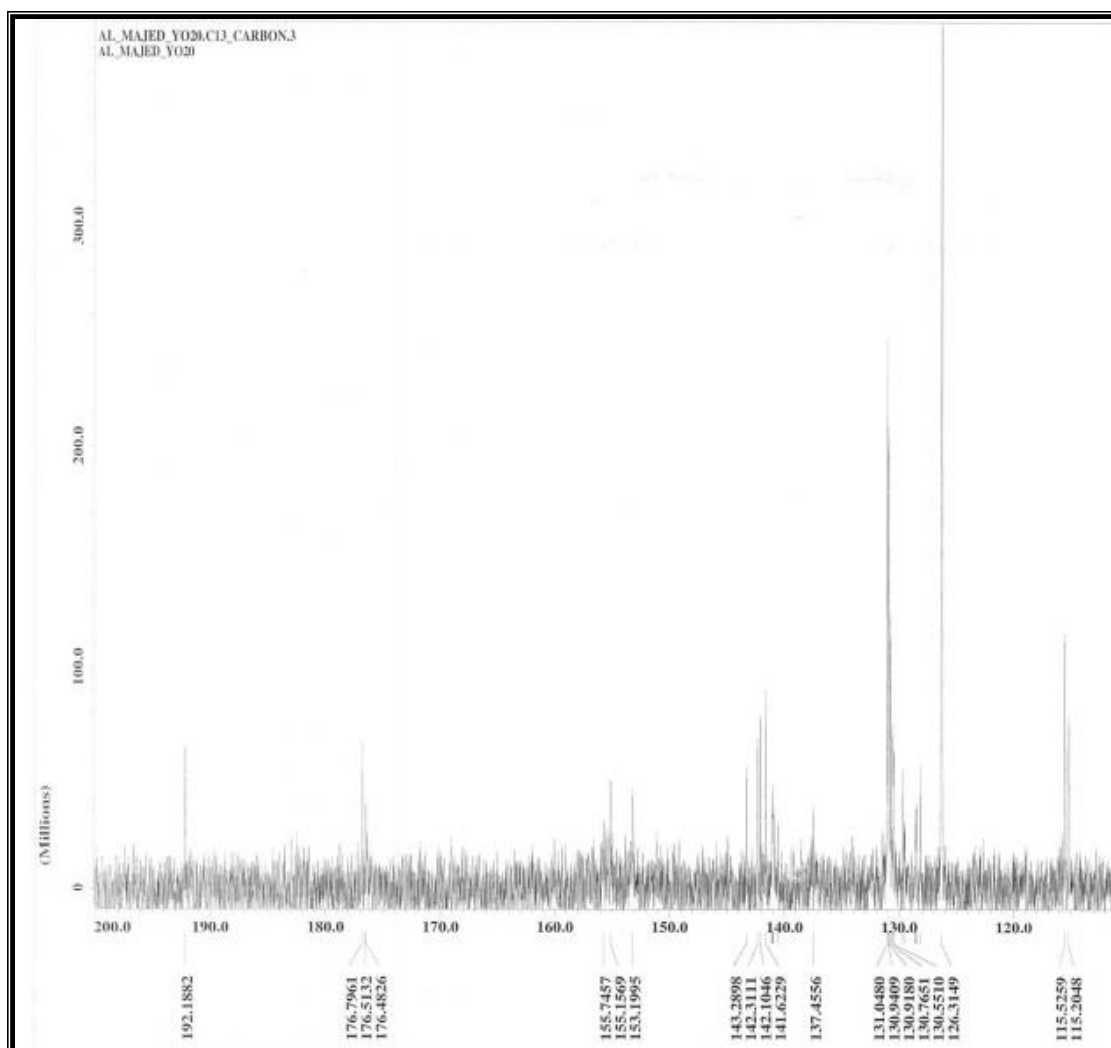

$^{13}\text{C}$ NMR spectrum of the compound **6c**

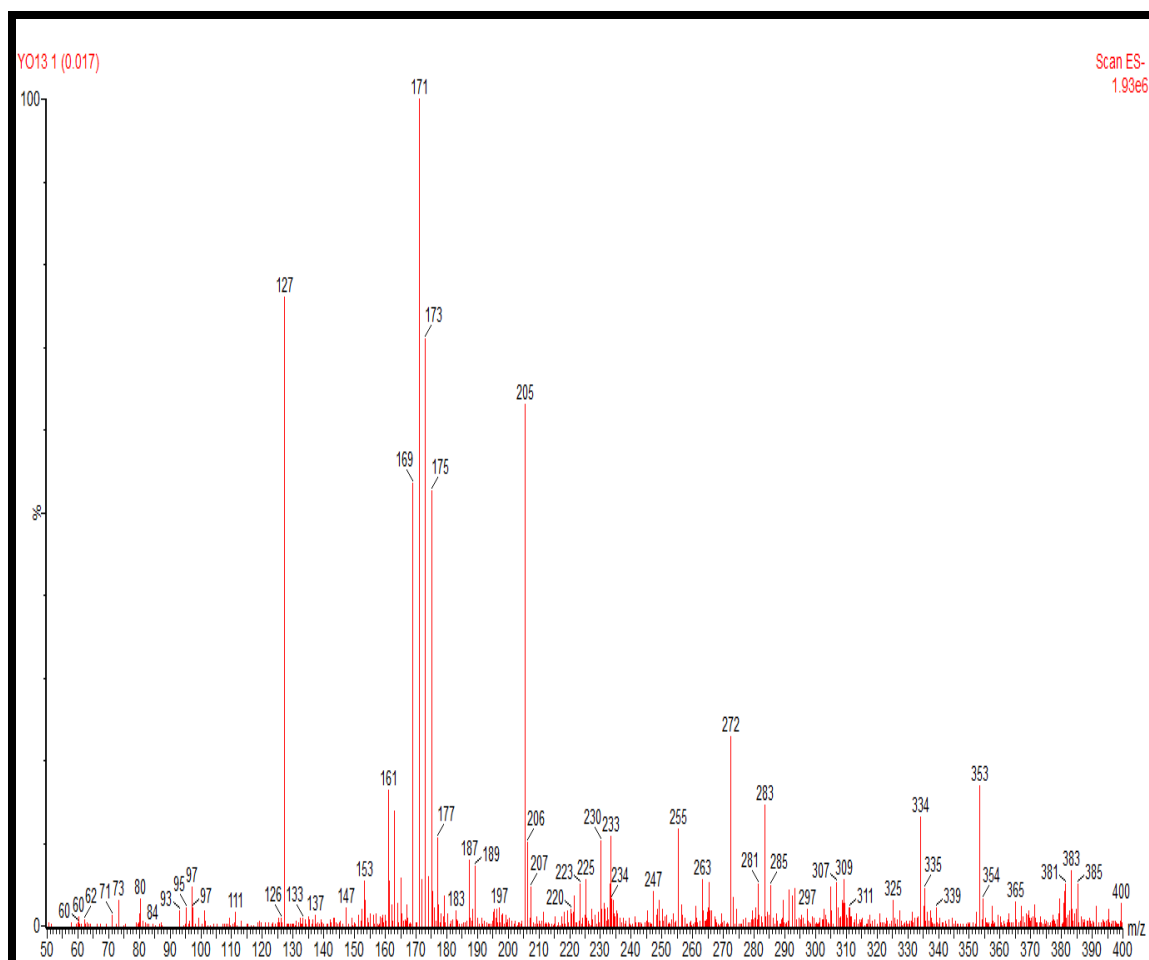

MS spectrum of the compound **6c**

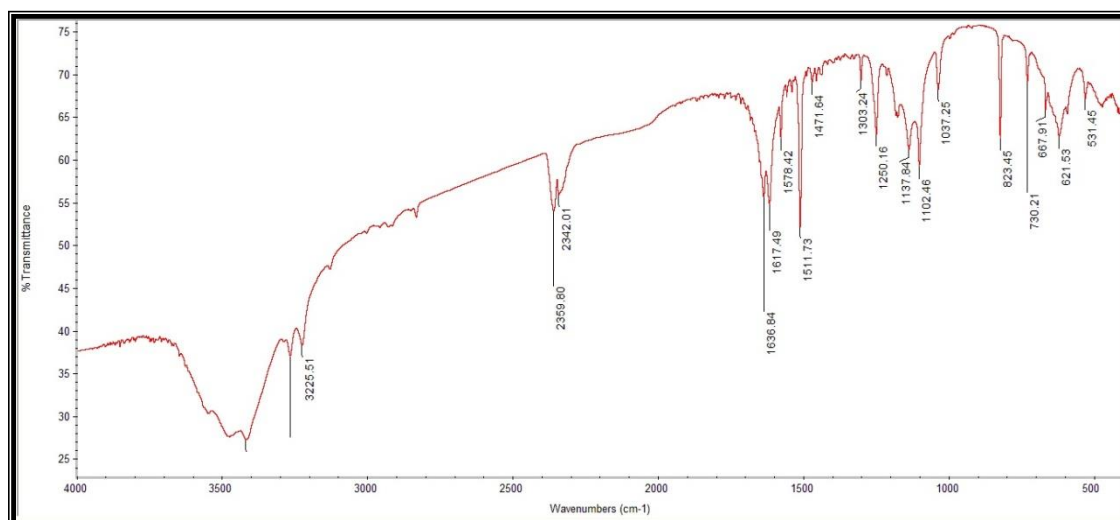

IR spectrum of the compound **7a**

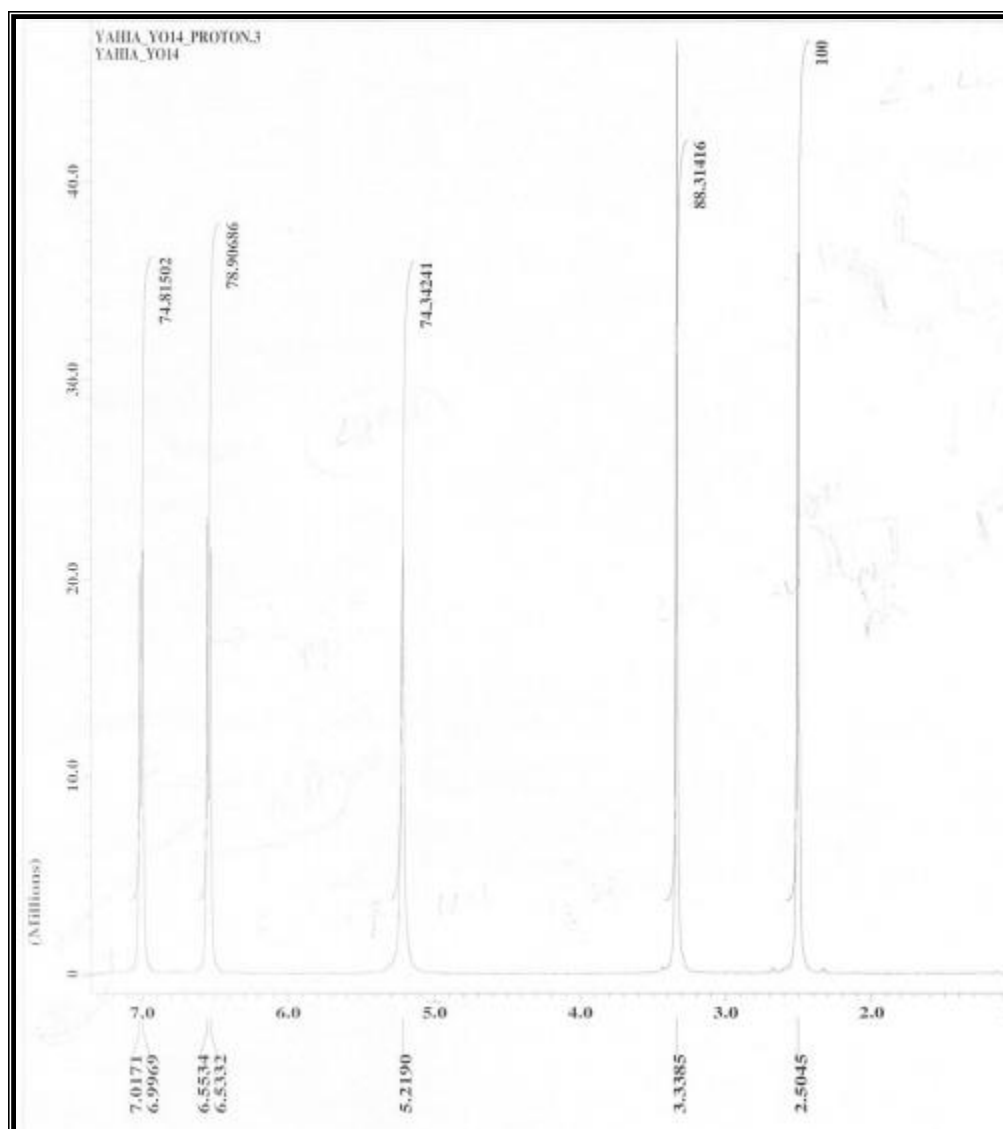

<sup>1</sup>H NMR spectrum of the compound **7a**

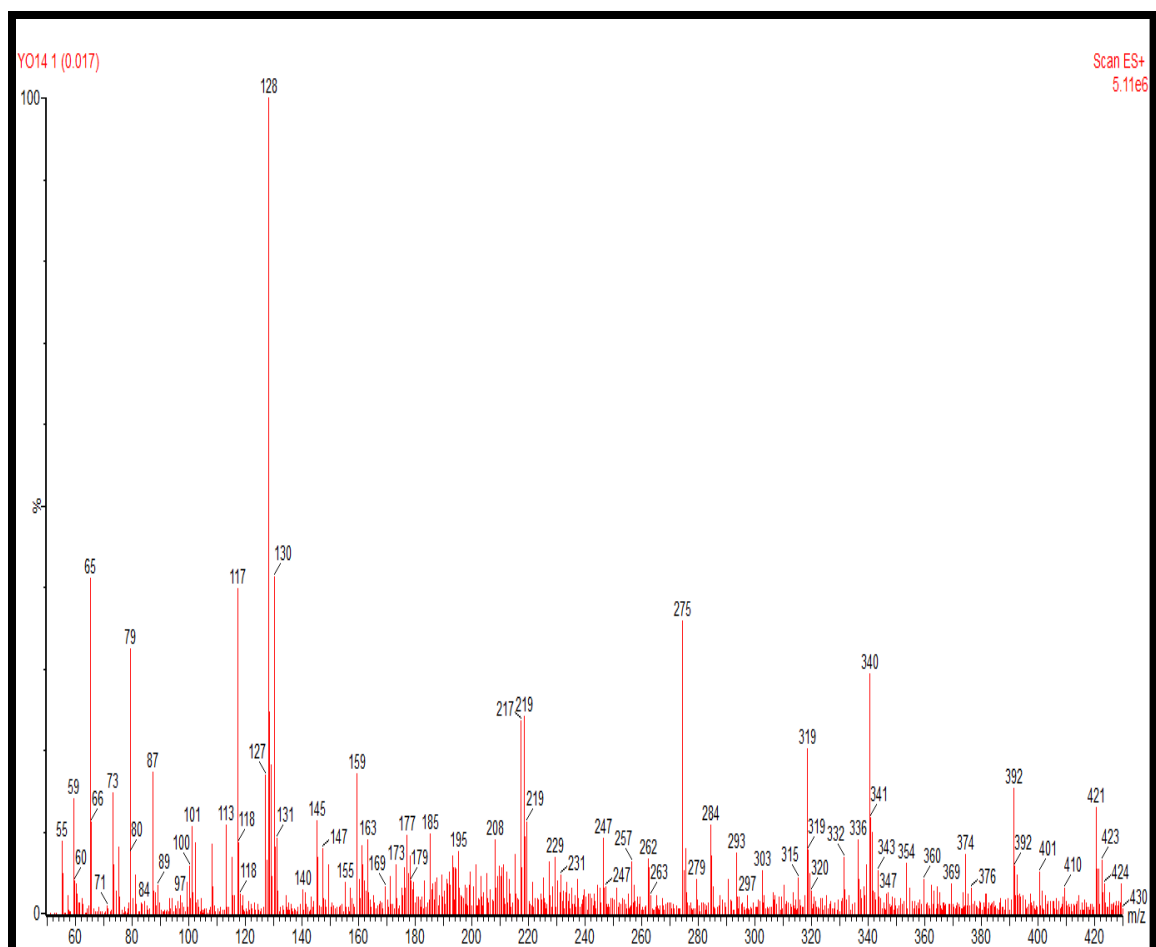

MS spectrum of the compound **7a**

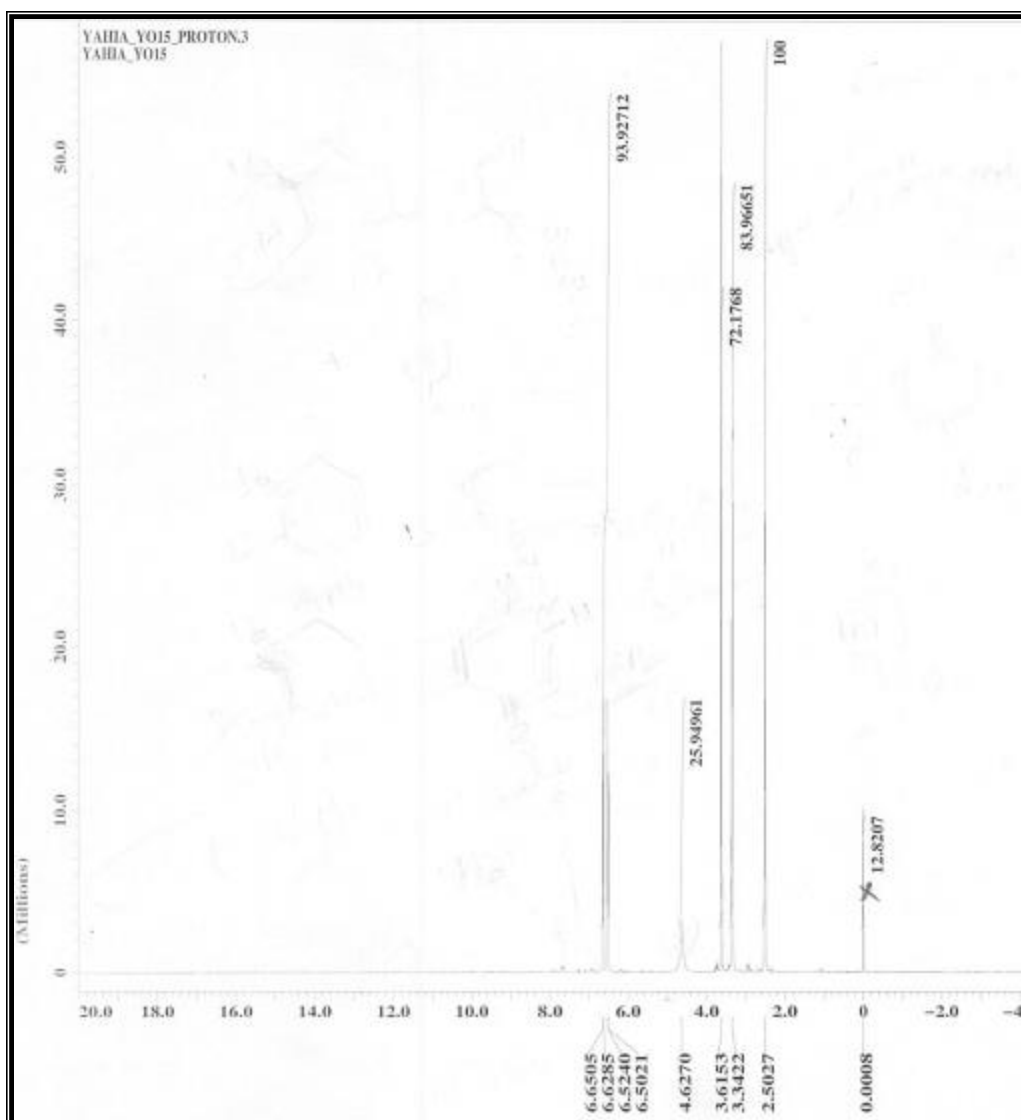

$^1\text{H}$ NMR spectrum of the compound **7b**

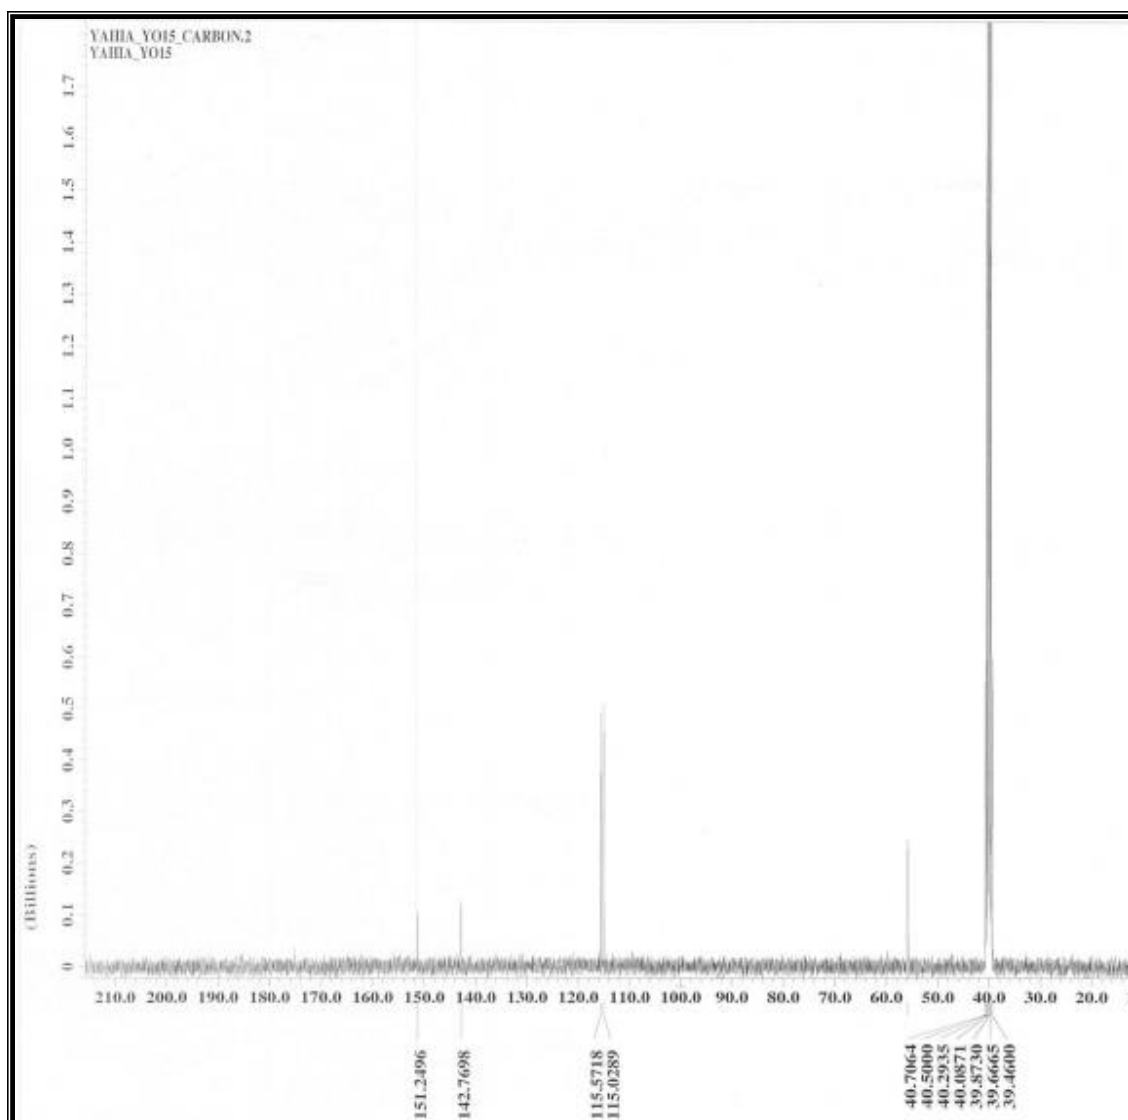

$^{13}\text{C}$ NMR spectrum of the compound **7b**



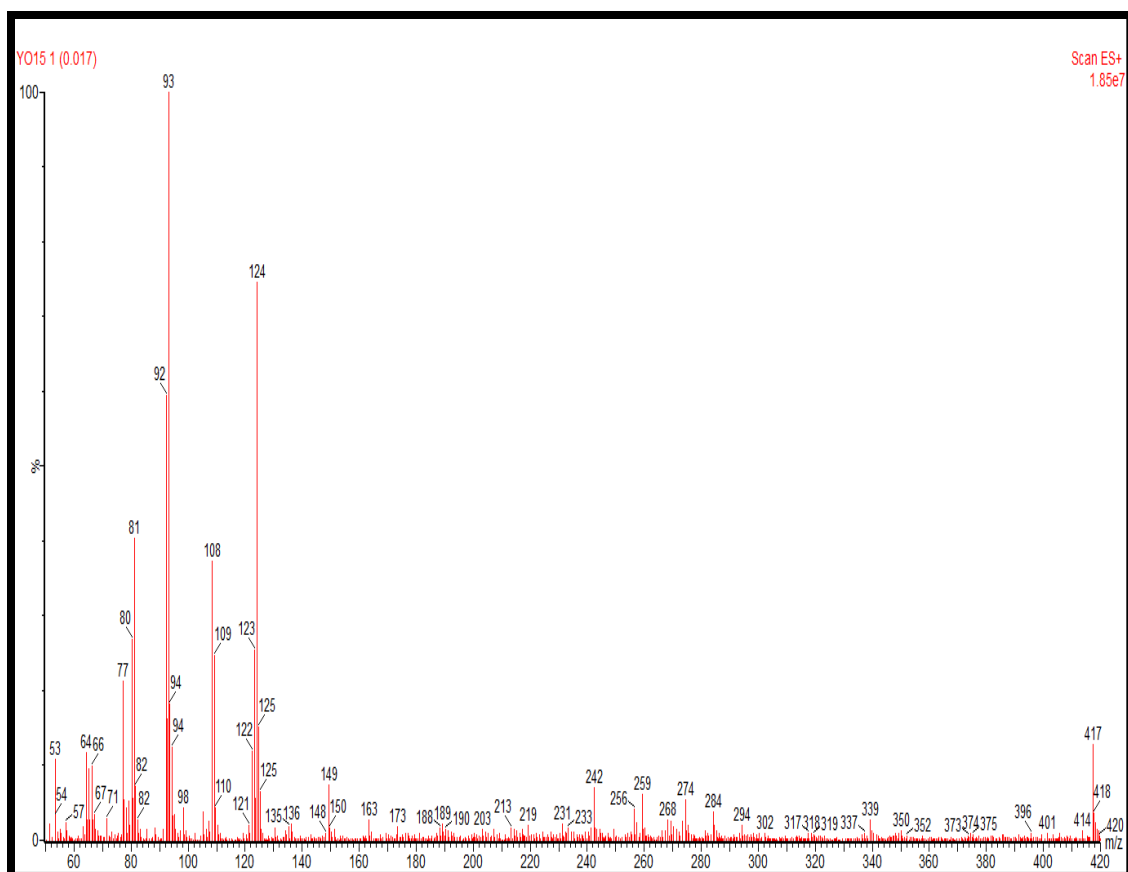

MS spectrum of the compound **7b**

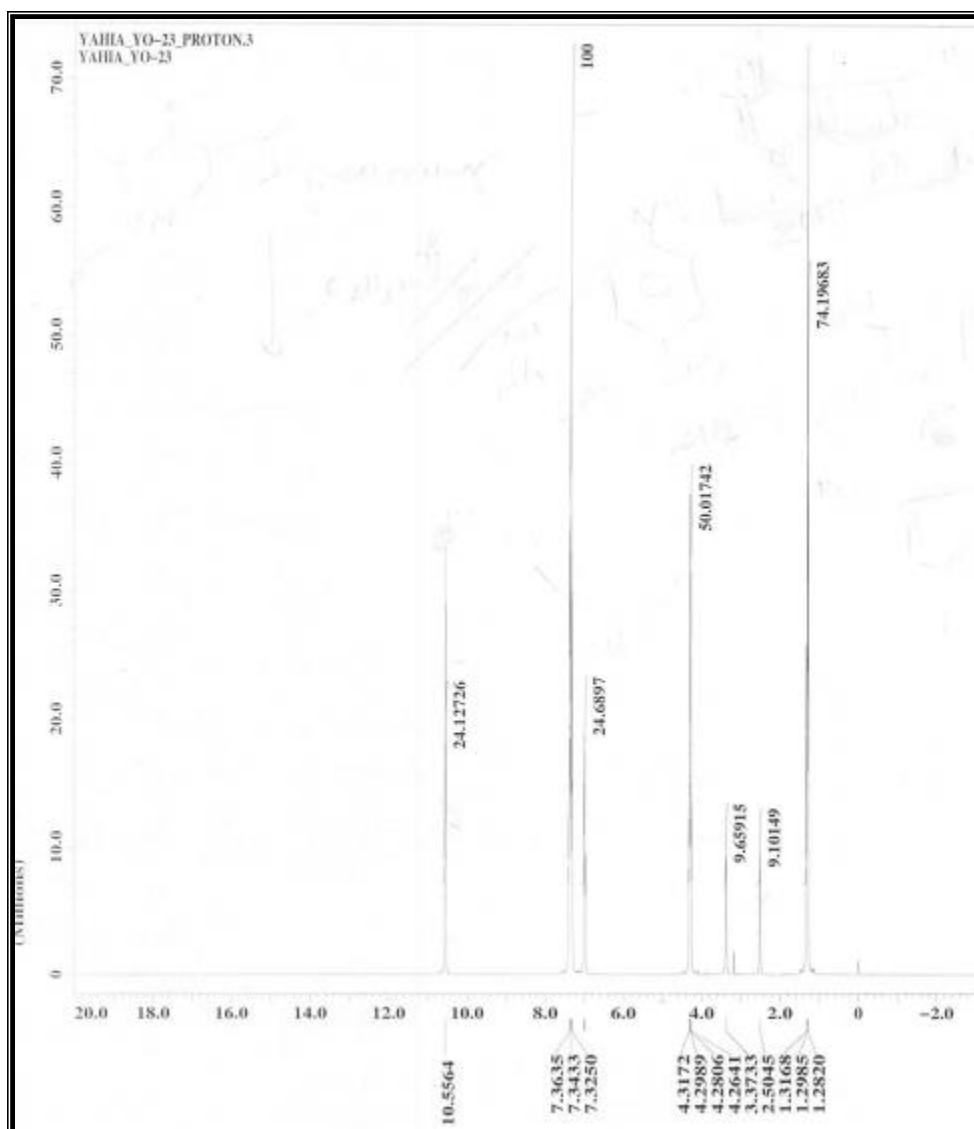

$^1\text{H}$ NMR spectrum of the compound **7c**

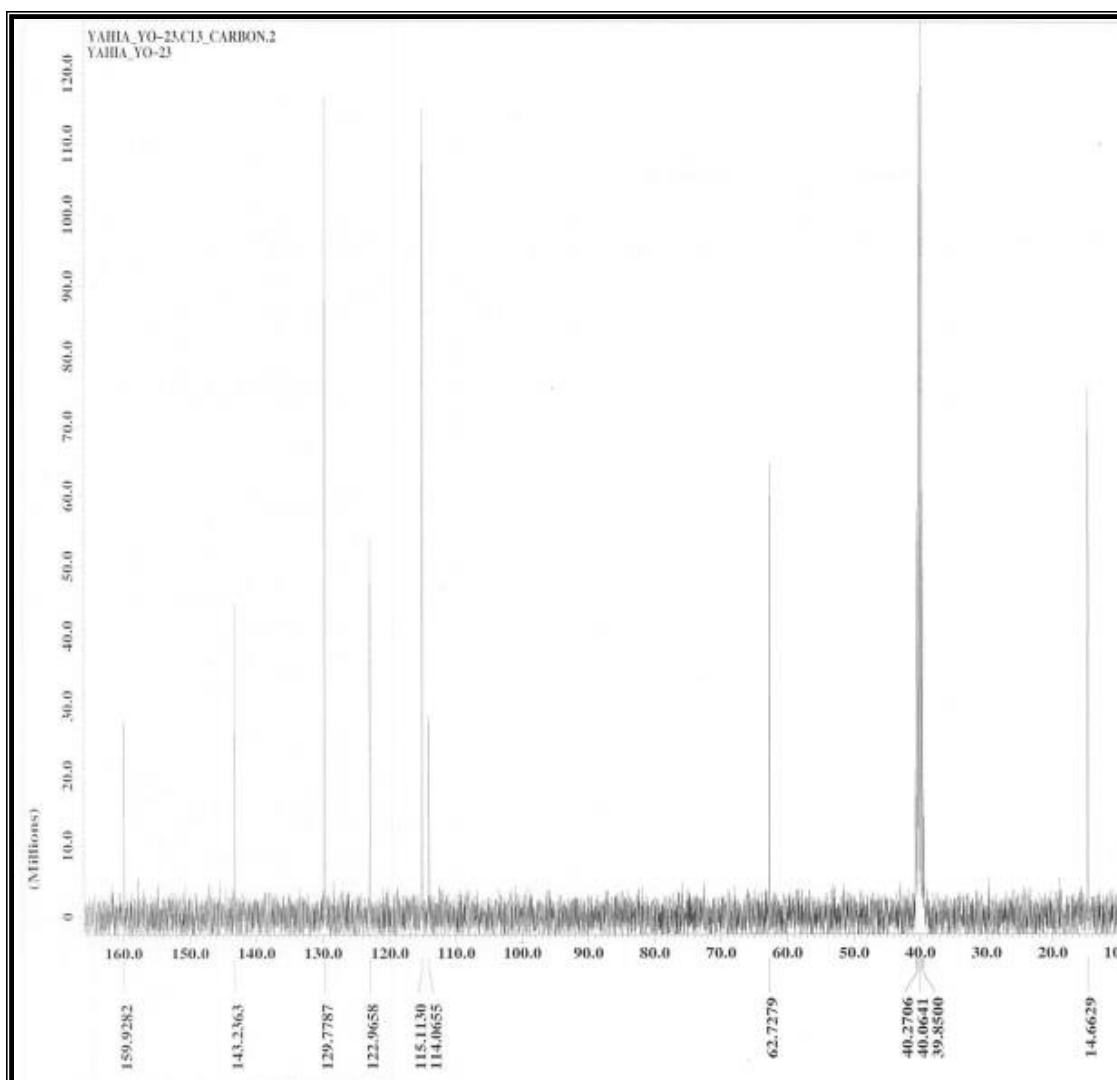

$^{13}\text{C}$ NMR spectrum of the compound **7c**

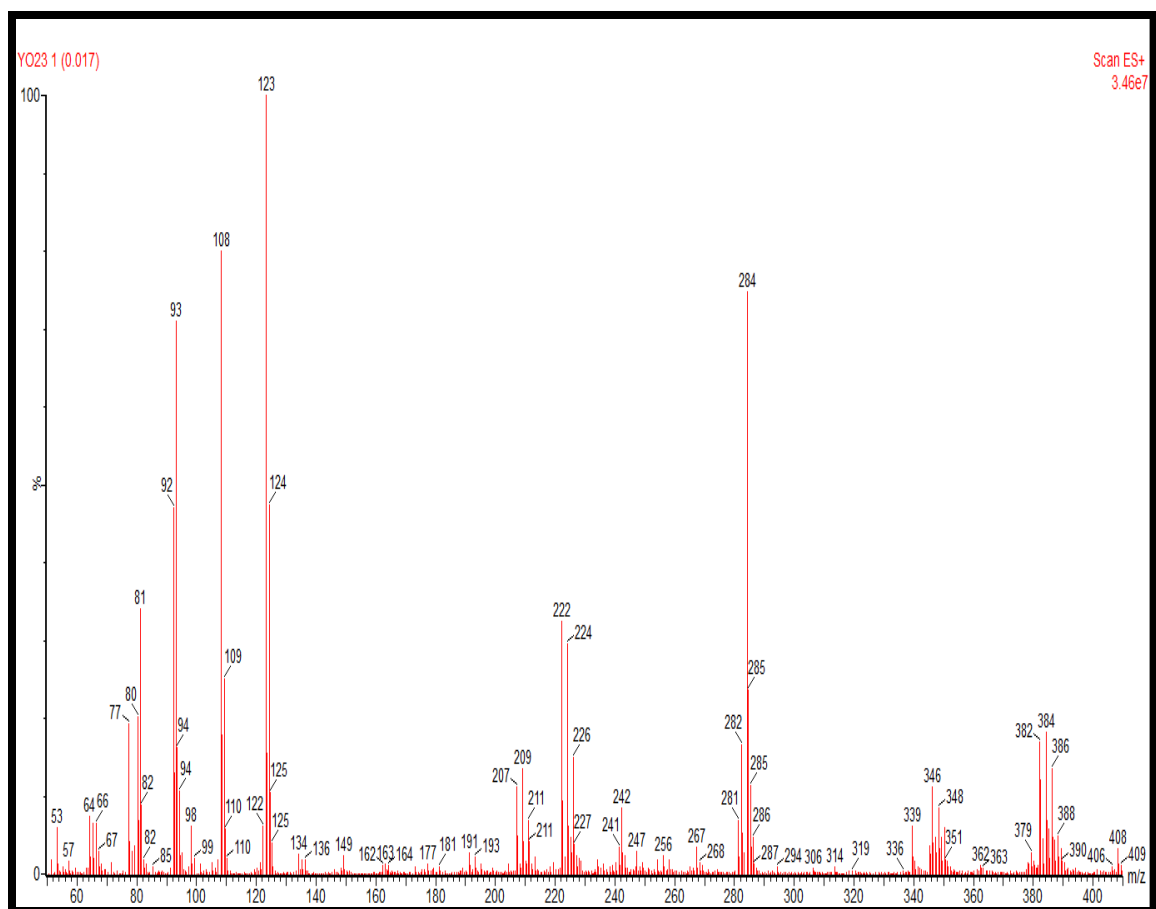

MS spectrum of the compound **7c**

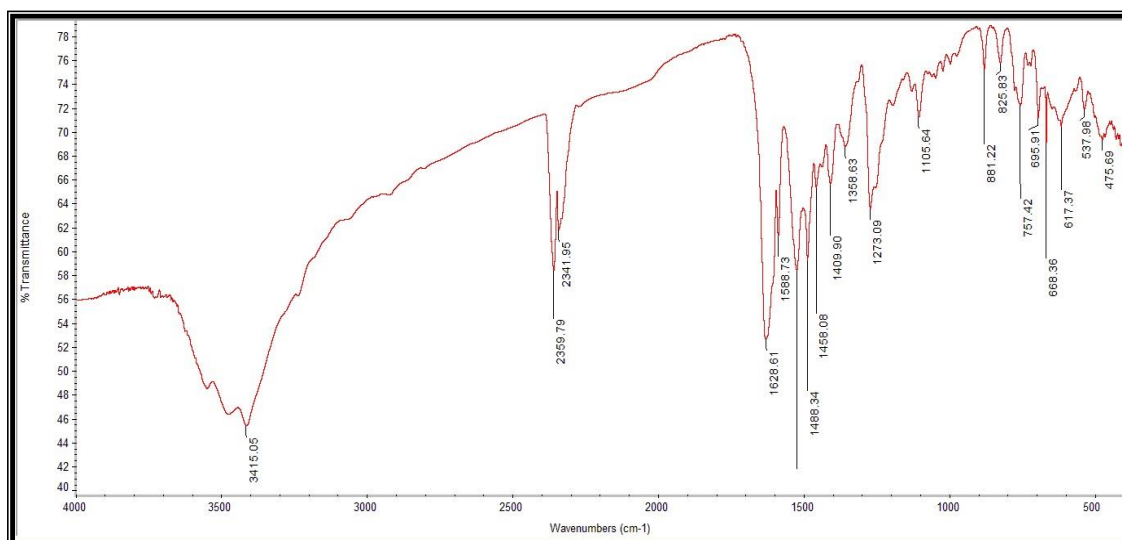

IR spectrum of the compound **8**

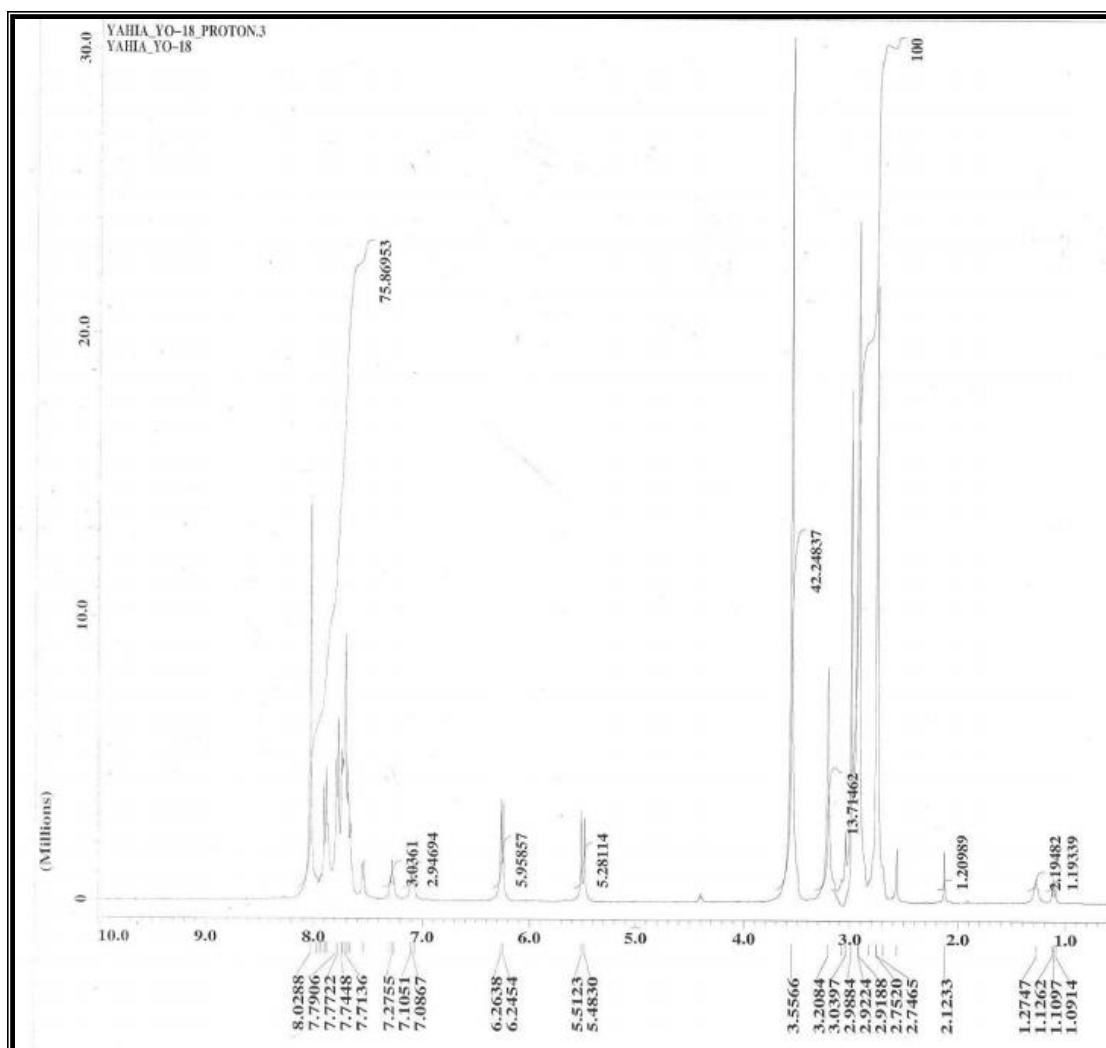

<sup>1</sup>H NMR spectrum of the compound **8**

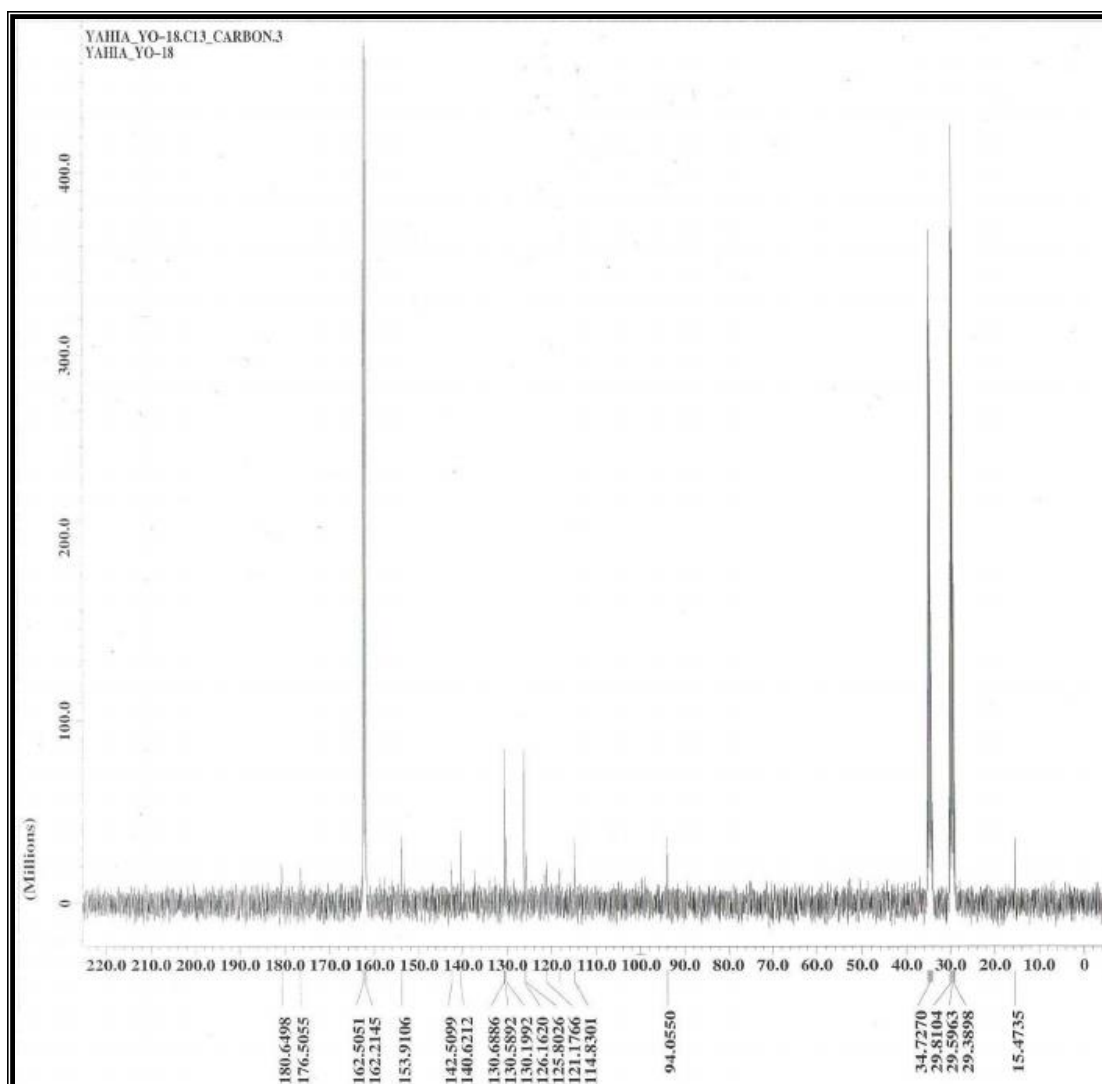

$^{13}\text{C}$ NMR spectrum of the compound **8**

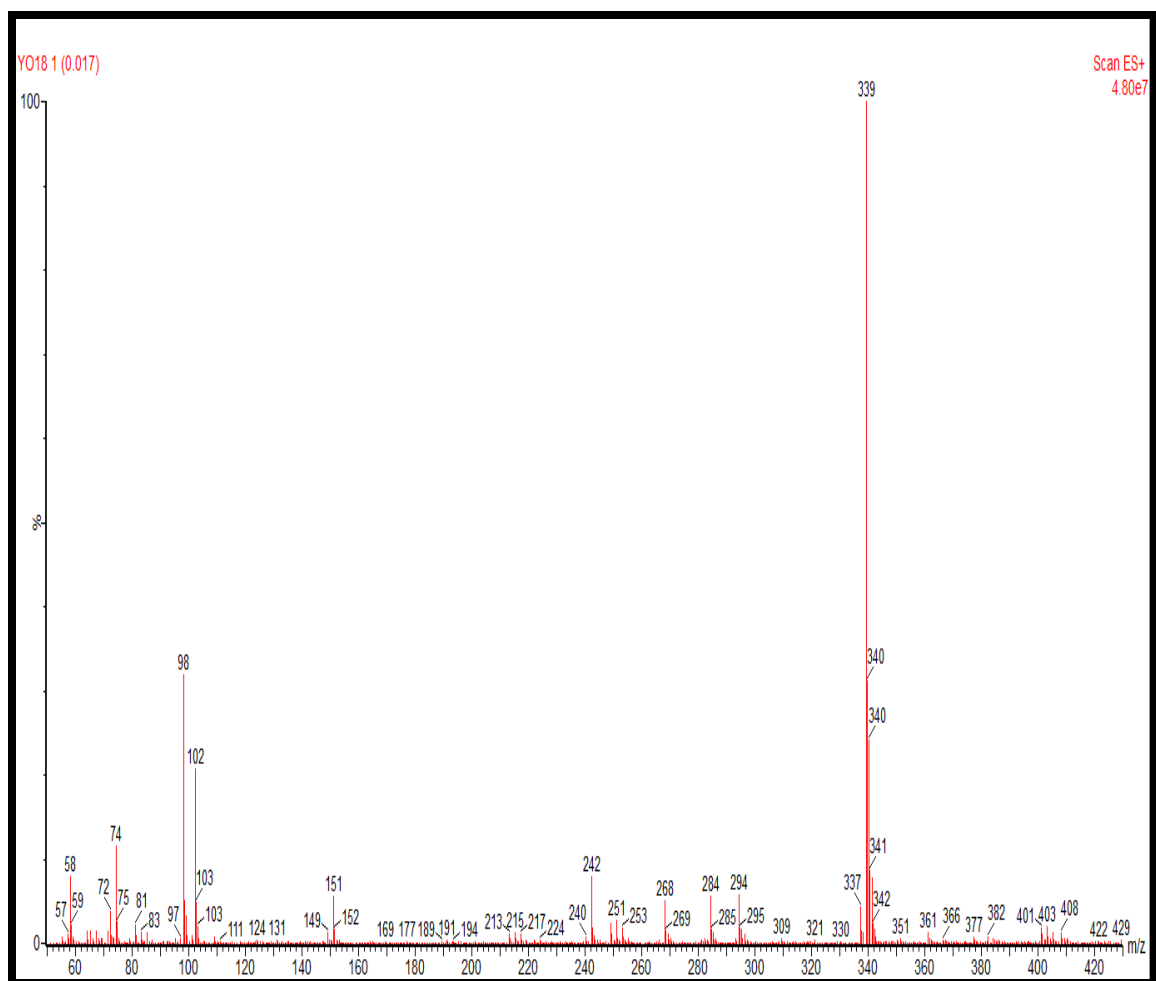

MS spectrum of the compound **8**

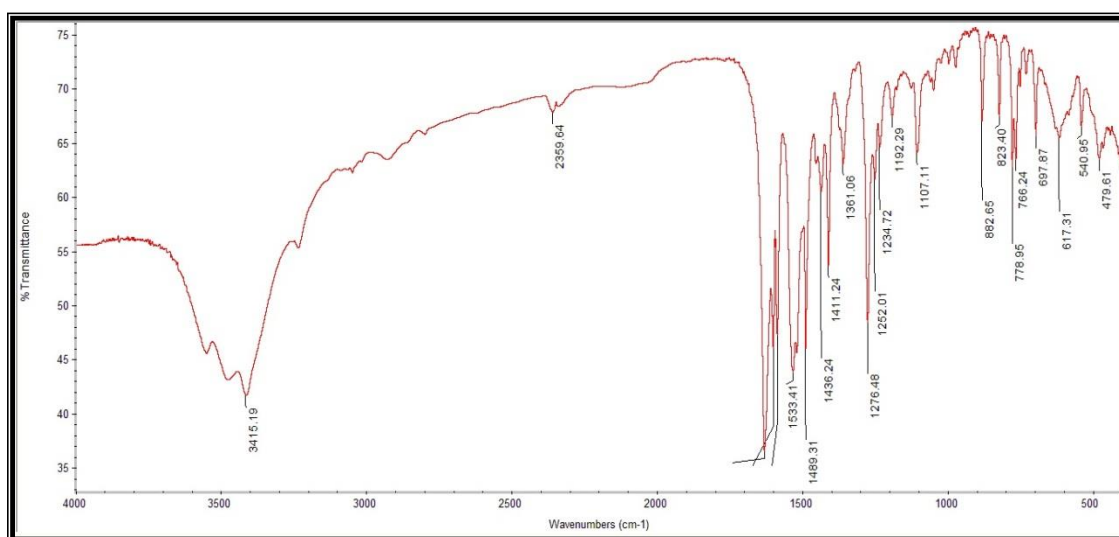

IR spectrum of the compound **9**

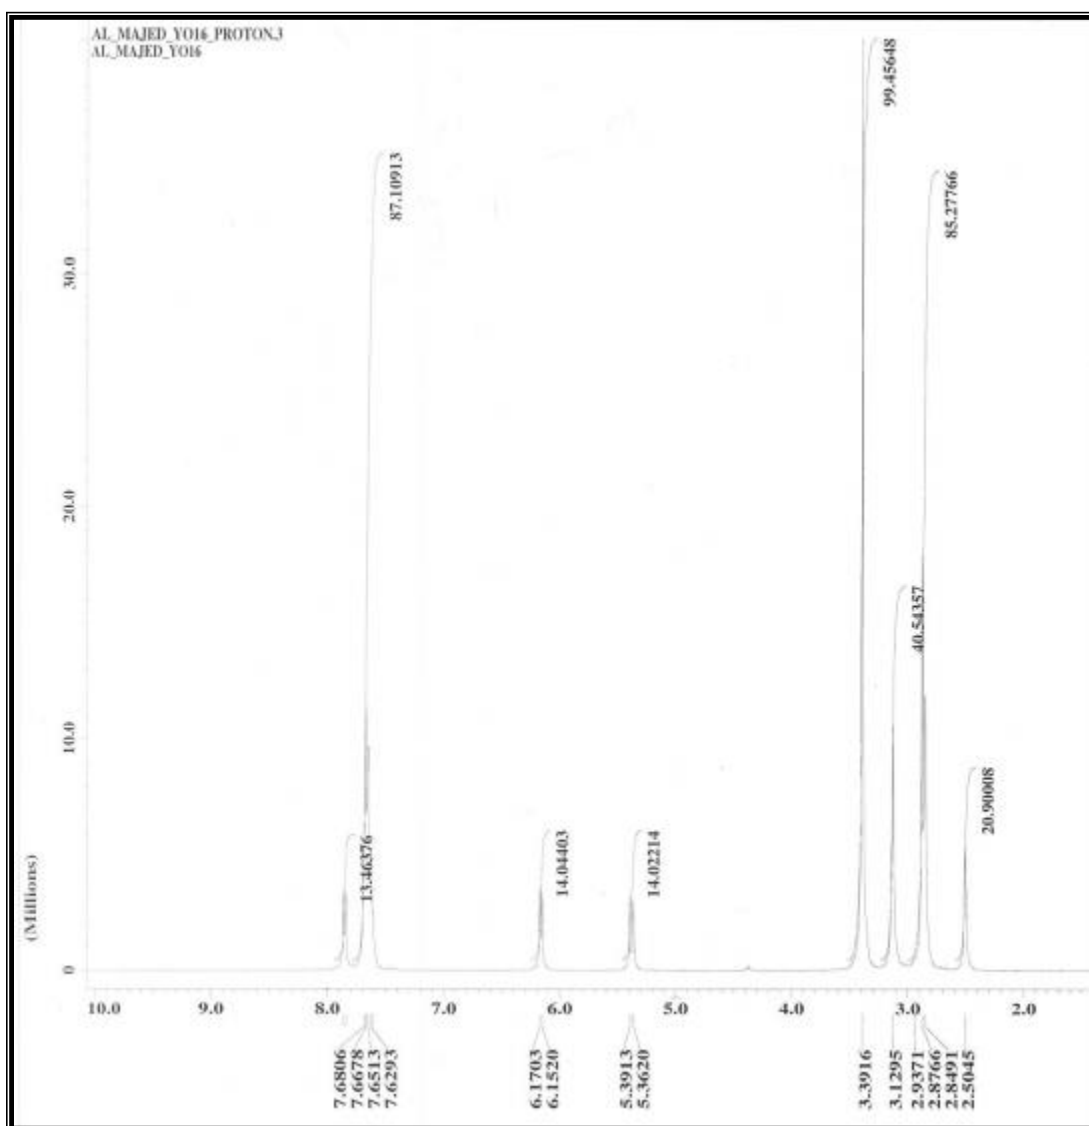

$^1\text{H}$ NMR spectrum of the compound **9**



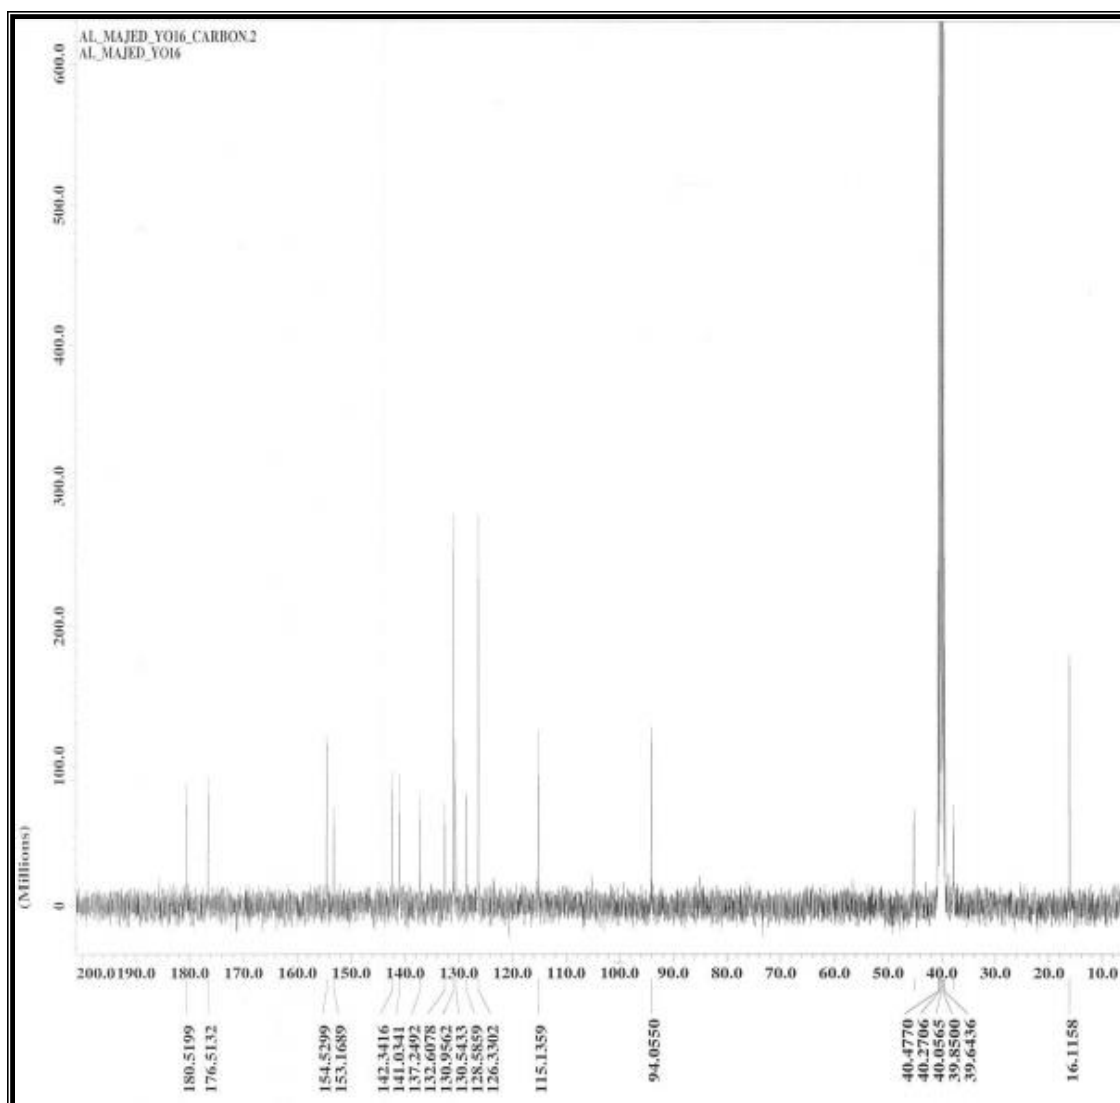

$^{13}\text{C}$ NMR spectrum of the compound **9**

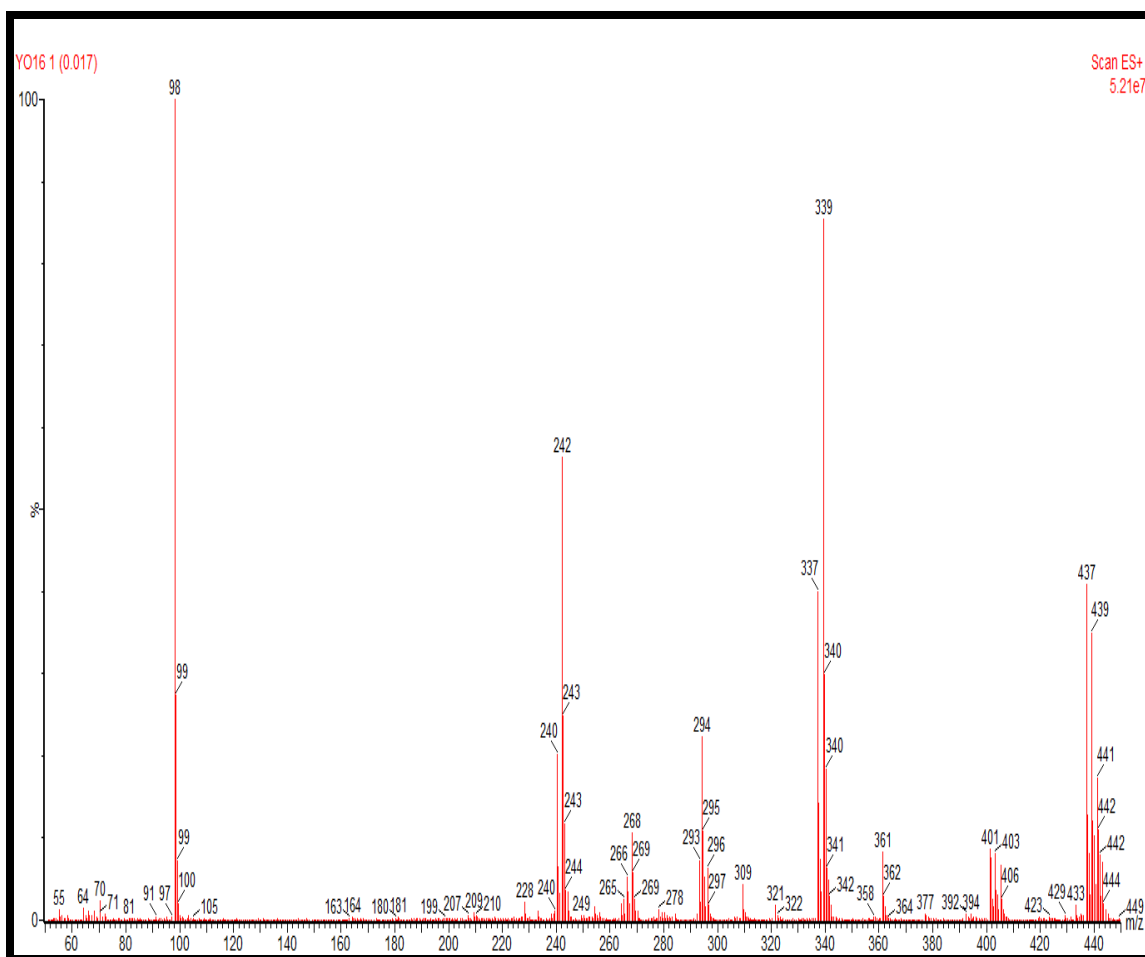

MS spectrum of the compound **9**
